# Supplementary material for: Experimental and Computational Study of the Antioxidative Potential of Novel Nitro and Amino Substituted Benzimidazole/Benzothiazole-2-Carboxamides with Antiproliferative Activity
Source: PubMed Central journal article supplement (PMC6826492; doi:10.3390/antiox8100477), 2019-10-12
Supplement: antioxidants-08-00477-s001.pdf [file antioxidants-08-00477-s001.pdf]

# Supporting Information

## Experimental and Computational Study of the Antioxidative Potential of Novel Nitro and Amino Substituted Benzimidazole/Benzothiazole-2-Carboxamides with Antiproliferative Activity

Maja Cindrić<sup>1</sup>, Irena Sović<sup>1</sup>, Marija Mioč<sup>2</sup>, Lucija Hok<sup>3</sup>, Ida Boček<sup>1</sup>, Petra Roškarić<sup>1</sup>, Kristina Butković<sup>1</sup>, Irena Martin-Kleiner<sup>2</sup>, Kristina Starčević<sup>4</sup>, Robert Vianello<sup>3\*</sup>, Marijeta Kralj<sup>2\*</sup> and Marijana Hranjec<sup>1\*</sup>

<sup>1</sup> Department of Organic Chemistry, Faculty of Chemical Engineering and Technology, University of Zagreb, Marulićev trg 19, HR-10000 Zagreb, Croatia

<sup>2</sup> Division of Molecular Medicine, Ruđer Bošković Institute, Bijenička cesta 54, HR-10000 Zagreb, Croatia

<sup>3</sup> Division of Organic Chemistry and Biochemistry, Ruđer Bošković Institute, Bijenička cesta 54, HR-10000 Zagreb, Croatia

<sup>4</sup> Department of Chemistry and Biochemistry, Faculty of Veterinary Medicine, University of Zagreb, Heinzelova 55, HR-10000 Zagreb, Croatia

\* Correspondence: robert.vianello@irb.hr (R.V.); marijeta.kralj@irb.hr (M.K.); mhranjec@fkit.hr (M.H.)

### Contents of Supporting Information:

1. Figures S1-S52 are NMR spectra of novel compounds (pages S2–S27)
2. Figure S53: Impact of compounds on cellular ROS production (page S28)
3. Figure S54: Impact of compounds on mitochondrial ROS production (page S28)
4. Materials and methods: *Cell culturing, Cellular ROS measurement assay*, *Mitochondrial ROS measurement assay* (page S29)

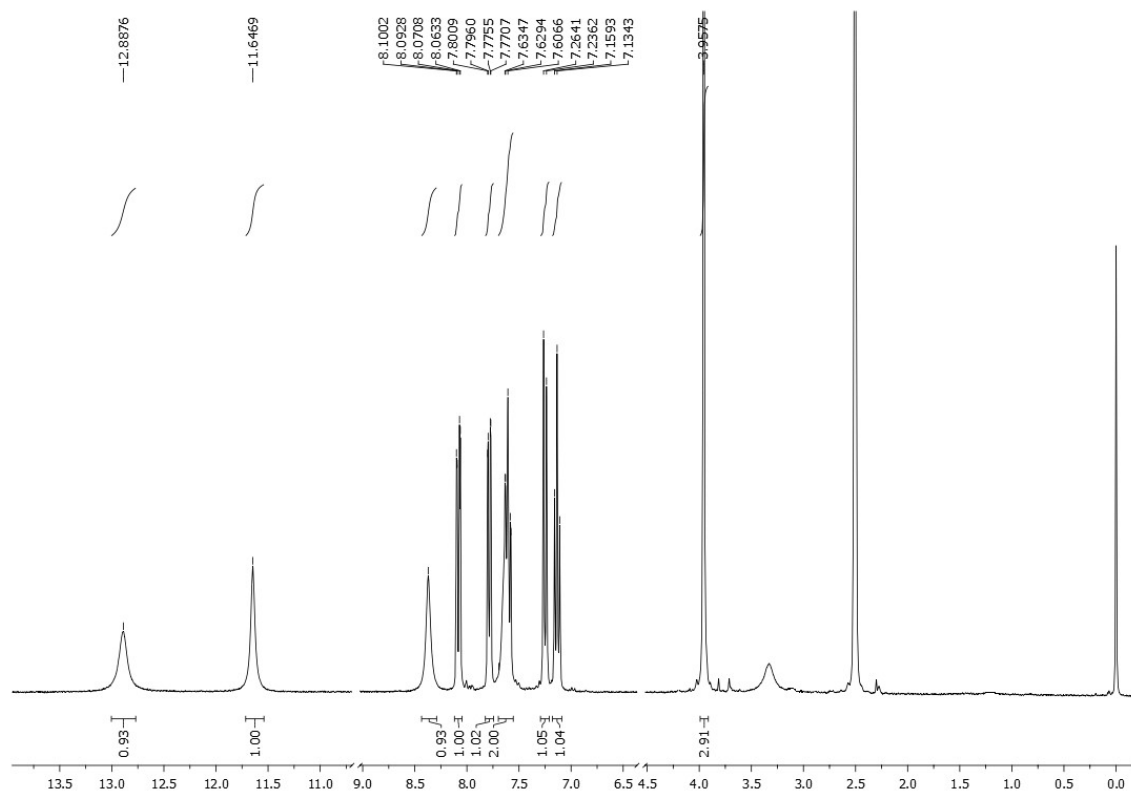

**Figure S1.**  $^1\text{H}$  NMR spectrum (DMSO- $d_6$ , 300 MHz) of *2-methoxy-N-[5(6)-nitrobenzimidazol-2-yl]benzamide 6*.

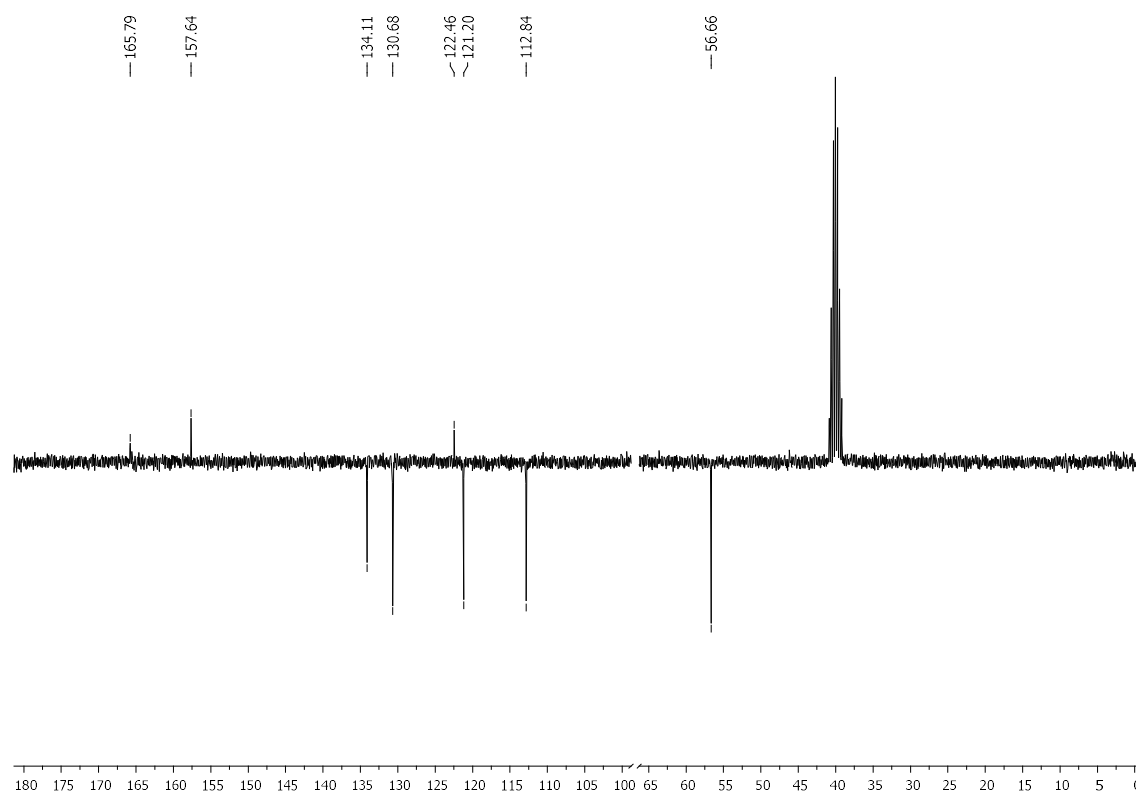

**Figure S2.**  $^{13}\text{C}$  NMR spectrum (DMSO- $d_6$ , 75 MHz) of *2-methoxy-N-[5(6)-nitrobenzimidazol-2-yl]benzamide 6*.

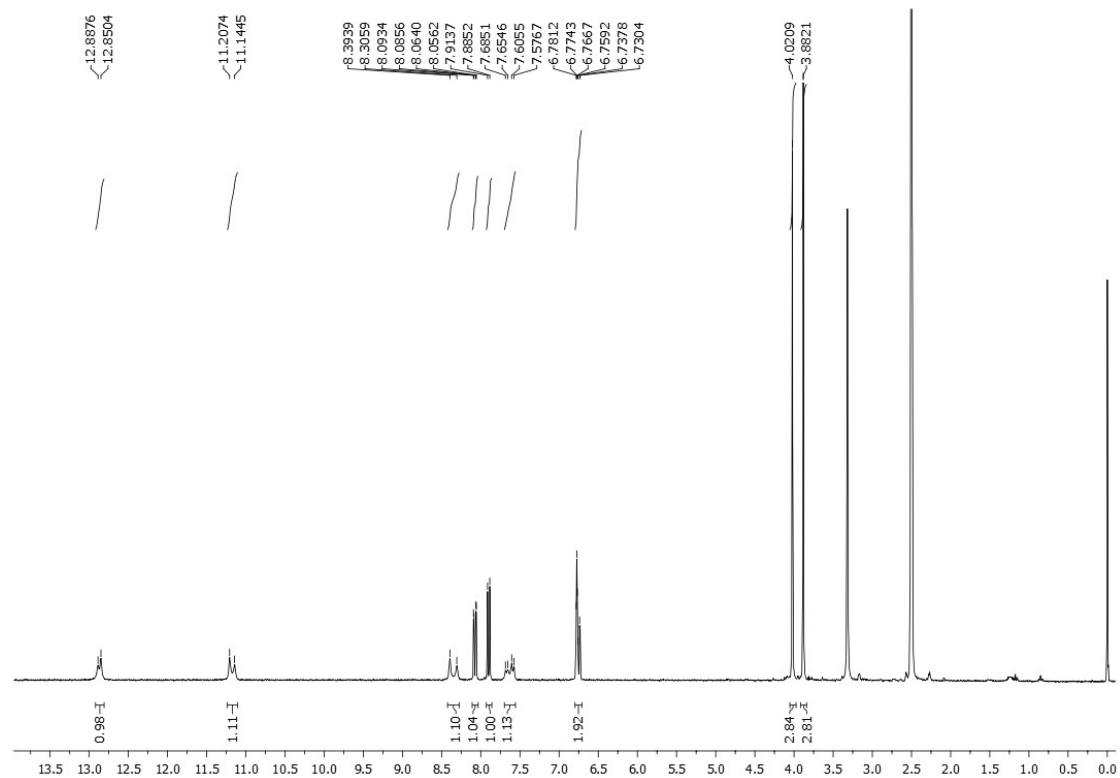

**Figure S3.**  $^1\text{H}$  NMR spectrum (DMSO- $d_6$ , 300 MHz) of *2,4-dimethoxy-N-[5(6)-nitrobenzimidazol-2-yl]benzamide 7*.

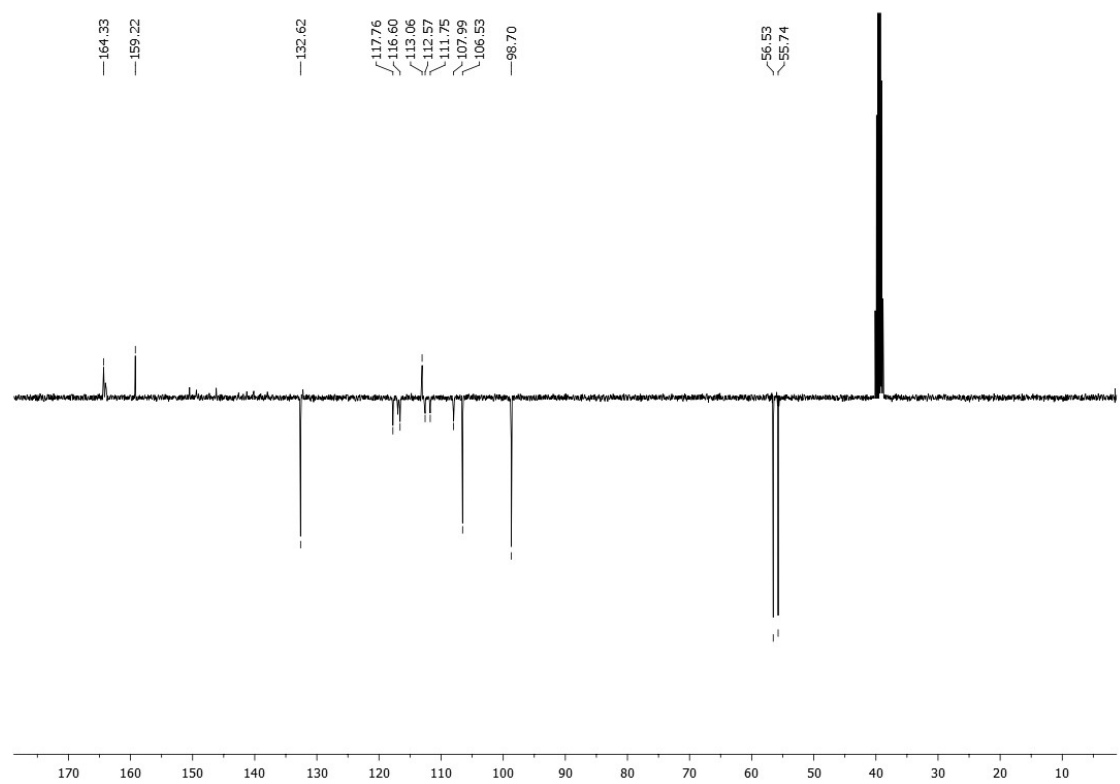

**Figure S4.**  $^{13}\text{C}$  NMR spectrum (DMSO- $d_6$ , 100 MHz) of *2,4-dimethoxy-N-[5(6)-nitrobenzimidazol-2-yl]benzamide 7*.

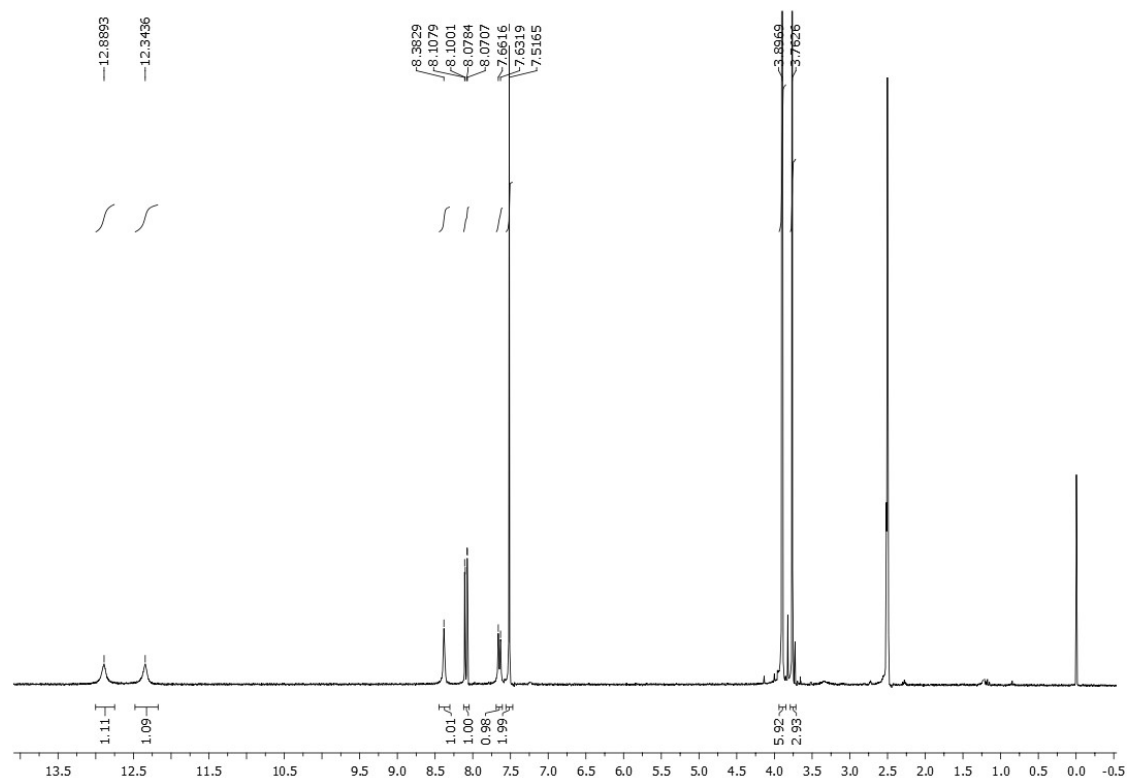

**Figure S5.**  $^1\text{H}$  NMR spectrum (DMSO- $d_6$ , 300 MHz) of *3,4,5-trimethoxy-N-[5(6)-nitrobenzimidazol-2-yl]benzamide 8*.

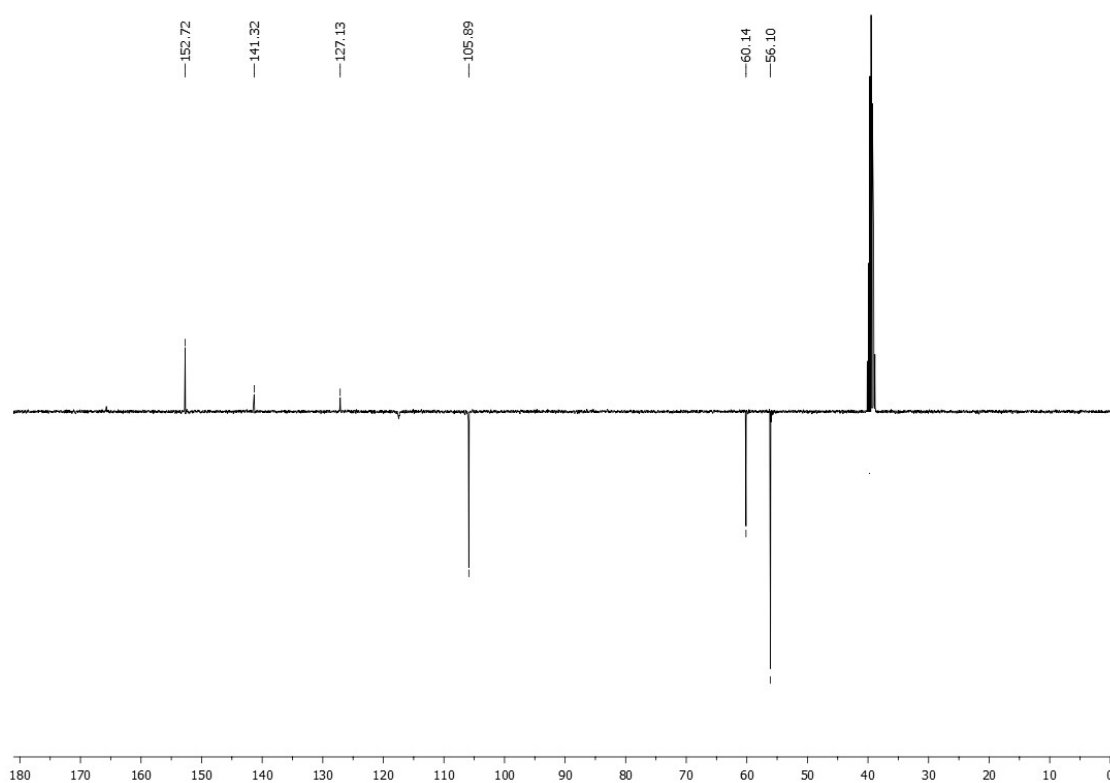

**Figure S6.**  $^{13}\text{C}$  NMR spectrum (DMSO- $d_6$ , 100 MHz) of *3,4,5-trimethoxy-N-[5(6)-nitrobenzimidazol-2-yl]benzamide 8*.

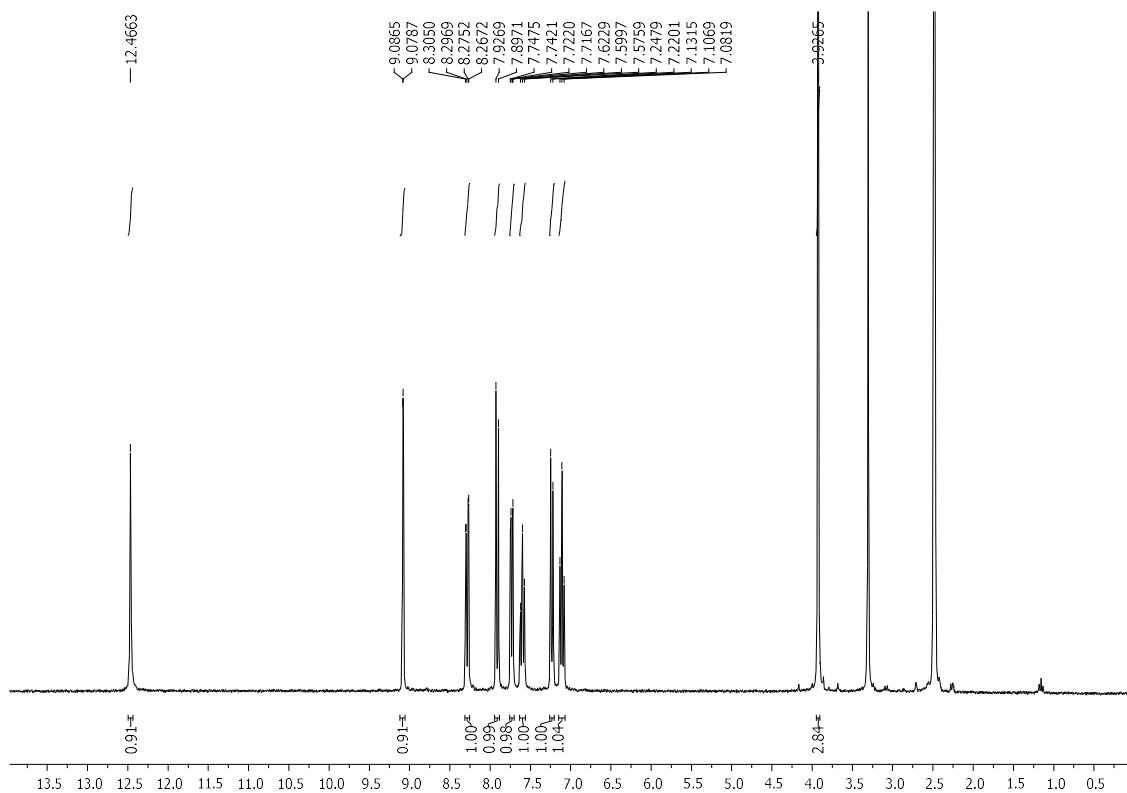

Figure S7.  $^1\text{H}$  NMR spectrum (DMSO- $d_6$ , 300 MHz) of *2-methoxy-N-(6-nitrobenzothiazol-2-yl)benzamide 9*.

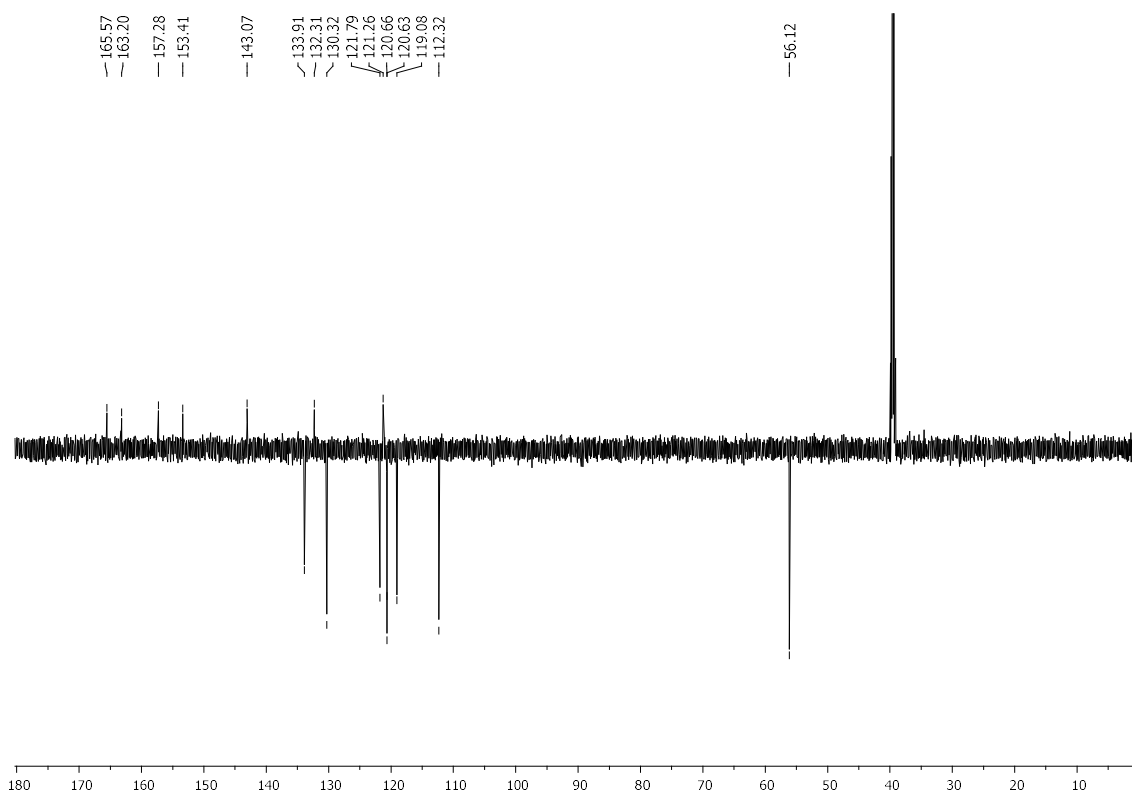

Figure S8.  $^{13}\text{C}$  NMR spectrum (DMSO- $d_6$ , 100 MHz) of *2-methoxy-N-(6-nitrobenzothiazol-2-yl)benzamide 9*.

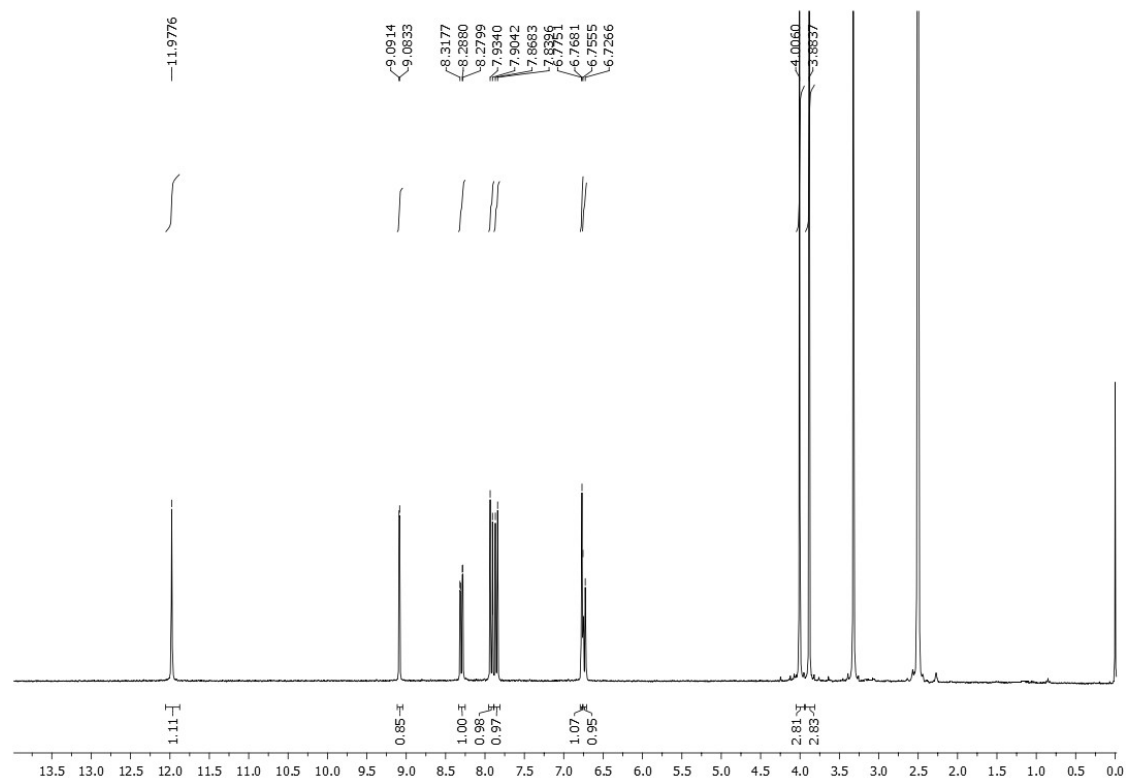

**Figure S9.**  $^1\text{H}$  NMR spectrum (DMSO- $d_6$ , 300 MHz) of **2,4-dimethoxy-N-(6-nitrobenzothiazol-2-yl)benzamide 10**.

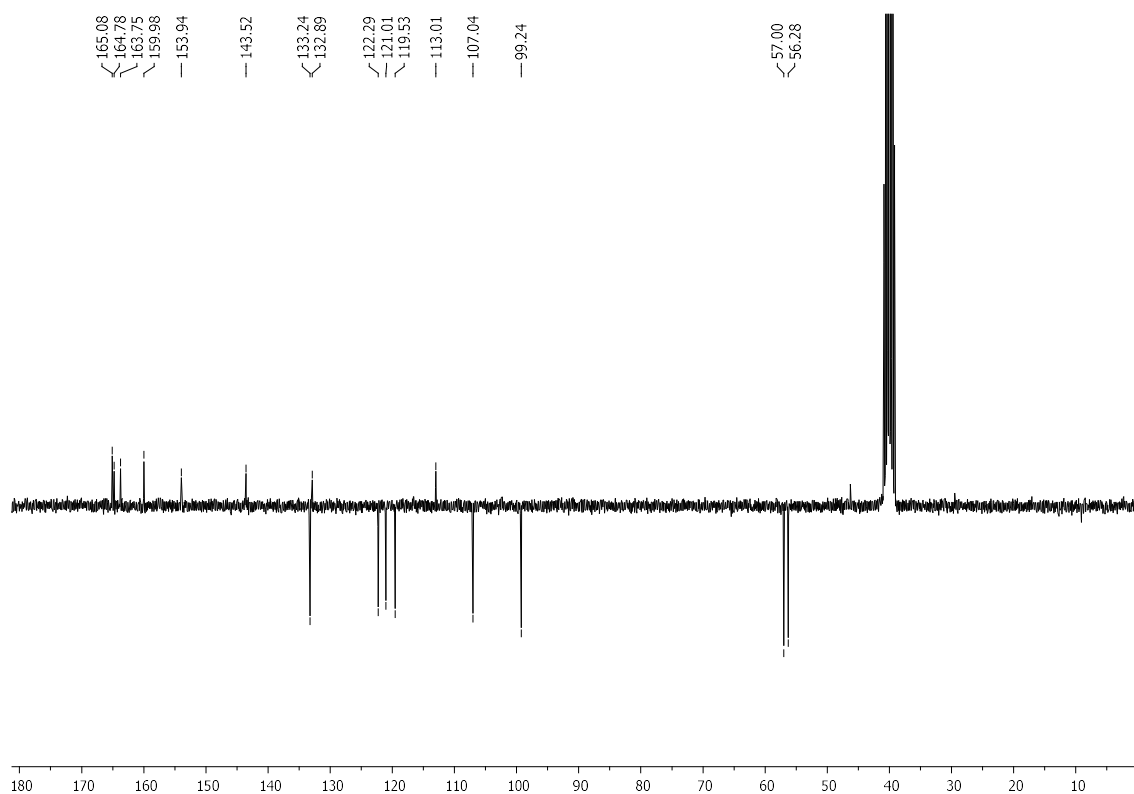

**Figure S10.**  $^{13}\text{C}$  NMR spectrum (DMSO- $d_6$ , 75 MHz) of **2,4-dimethoxy-N-(6-nitrobenzothiazol-2-yl)benzamide 10**.

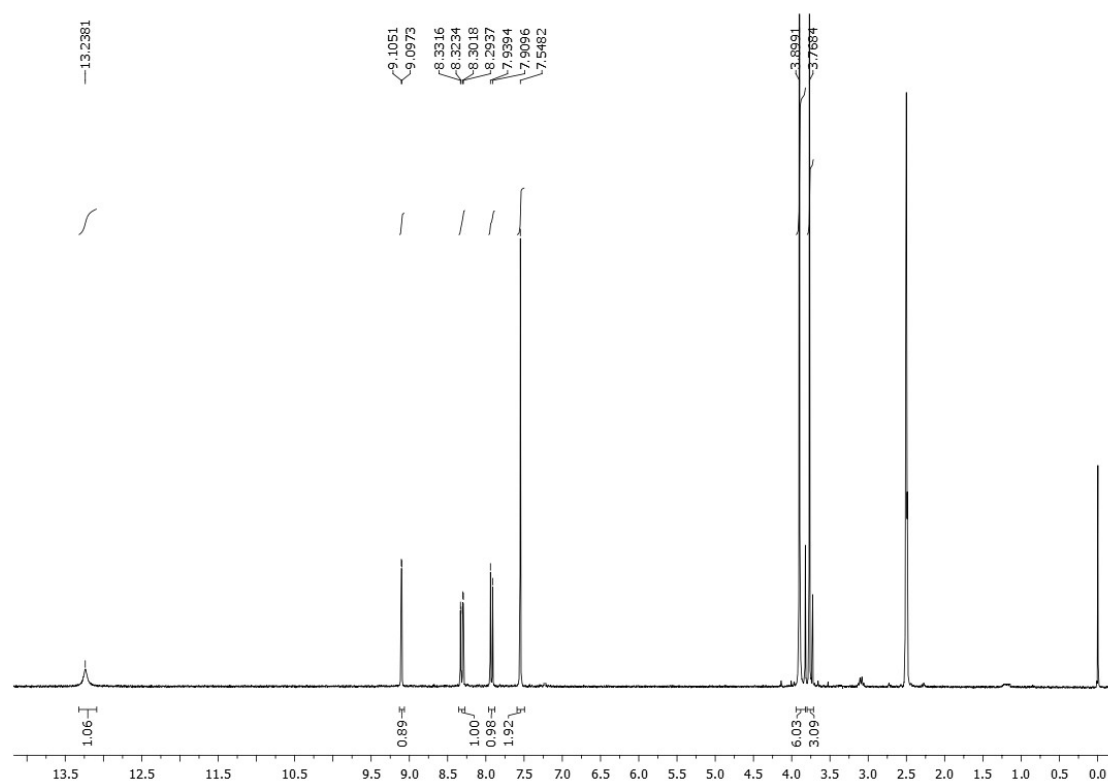

**Figure S11.**  $^1\text{H}$  NMR spectrum ( $\text{DMSO-}d_6$ , 300 MHz) of *3,4,5-trimethoxy-N-(6-nitrobenzothiazol-2-yl)benzamide 11*.

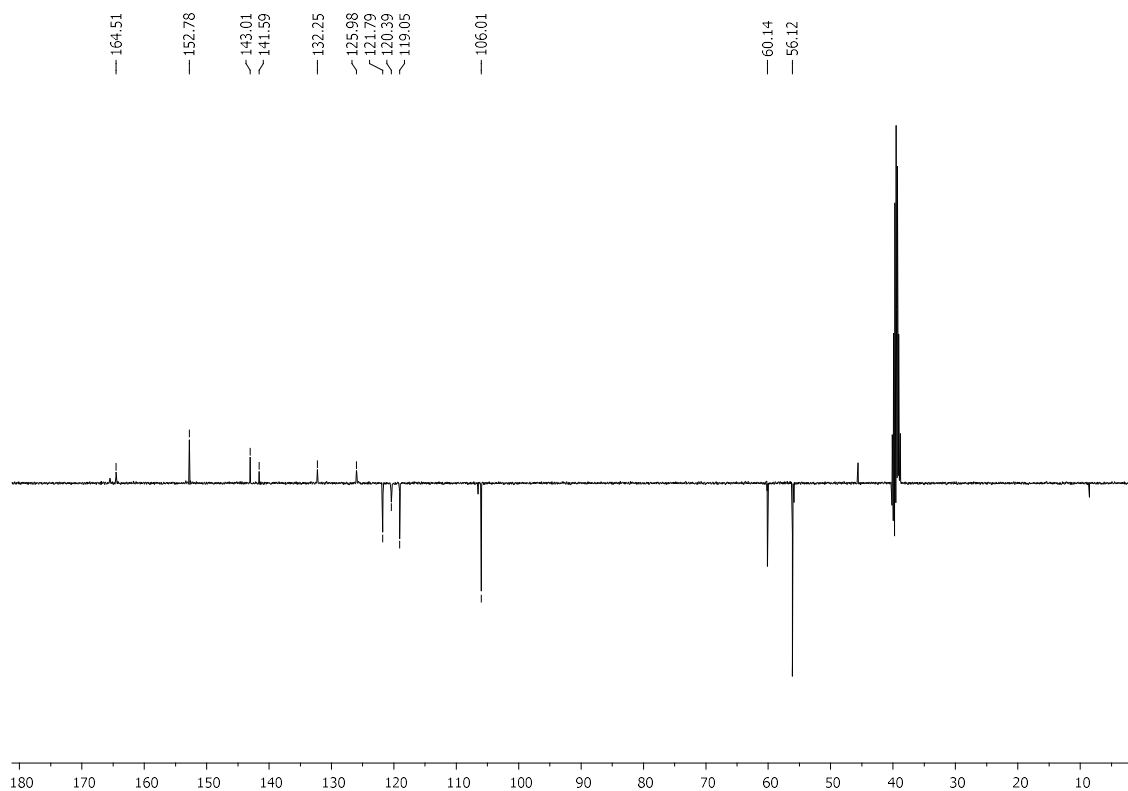

**Figure S12.**  $^{13}\text{C}$  NMR spectrum ( $\text{DMSO-}d_6$ , 100 MHz) of *3,4,5-trimethoxy-N-(6-nitrobenzothiazol-2-yl)benzamide 11*.

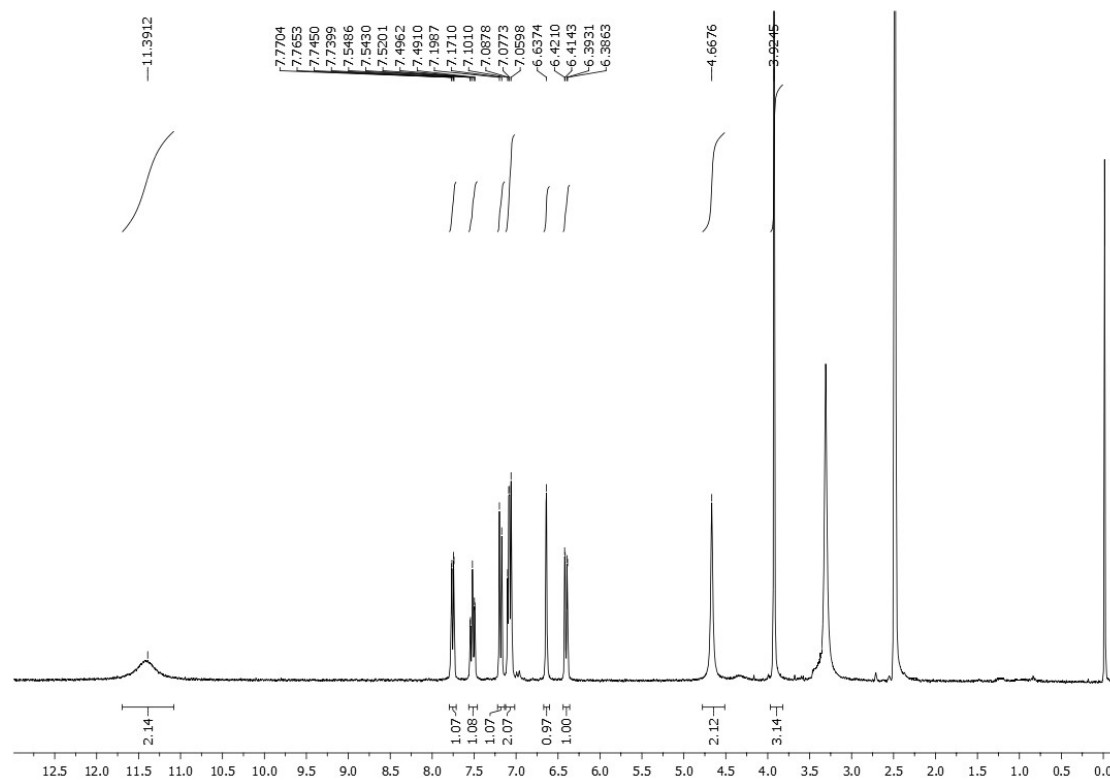

**Figure S13.**  $^1\text{H}$  NMR spectrum (DMSO- $d_6$ , 300 MHz) of *N*-[5(6)-aminobenzimidazol-2-yl]-2-methoxybenzamide **12**.

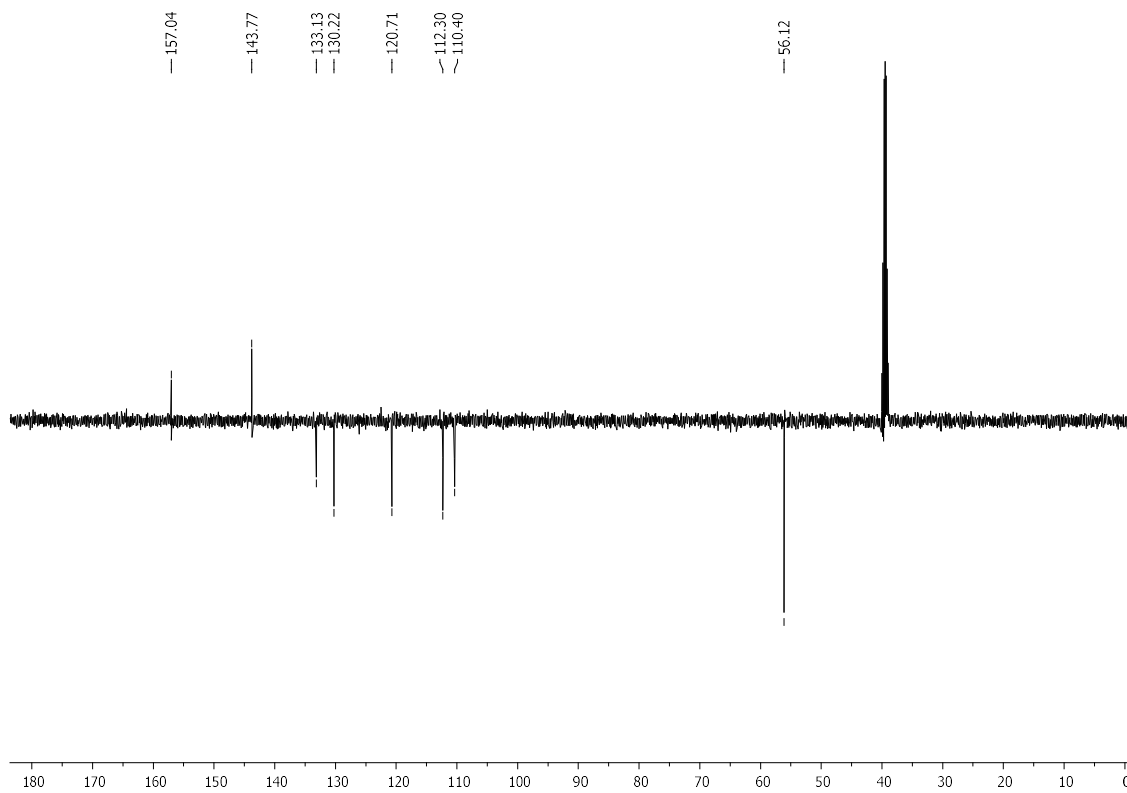

**Figure S14.**  $^{13}\text{C}$  NMR spectrum (DMSO- $d_6$ , 125 MHz) of *N*-[5(6)-aminobenzimidazol-2-yl]-2-methoxybenzamide **12**.



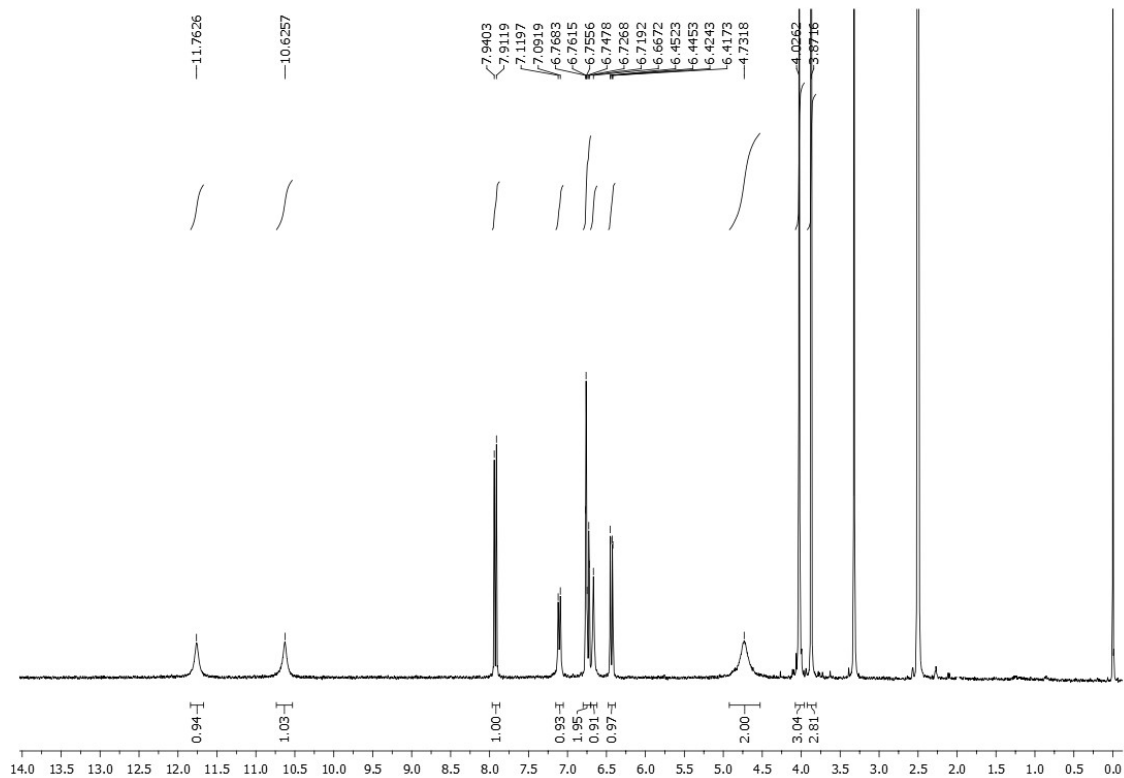

**Figure S15.**  $^1\text{H}$  NMR spectrum (DMSO- $d_6$ , 300 MHz) of *N*-[5(6)-aminobenzimidazol-2-yl]-2,4-dimethoxybenzamide **13**.

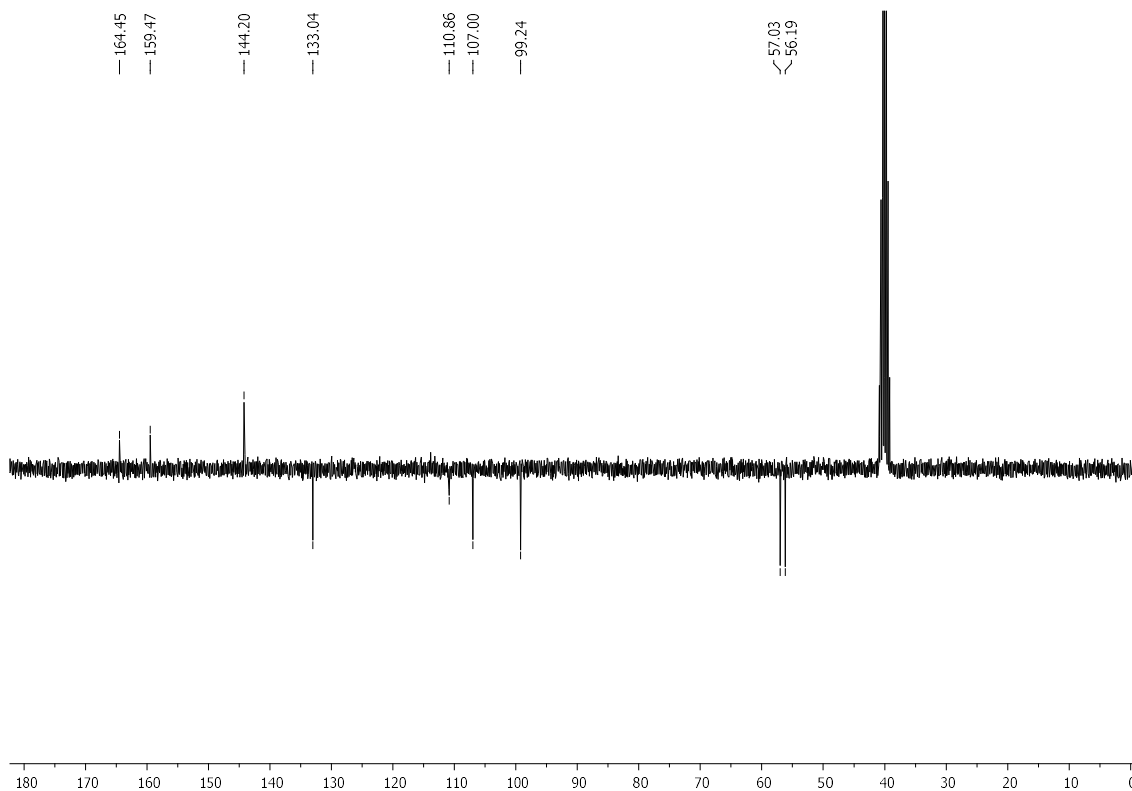

**Figure S16.**  $^{13}\text{C}$  NMR spectrum (DMSO- $d_6$ , 75 MHz) of *N*-[5(6)-aminobenzimidazol-2-yl]-2,4-dimethoxybenzamide **13**.

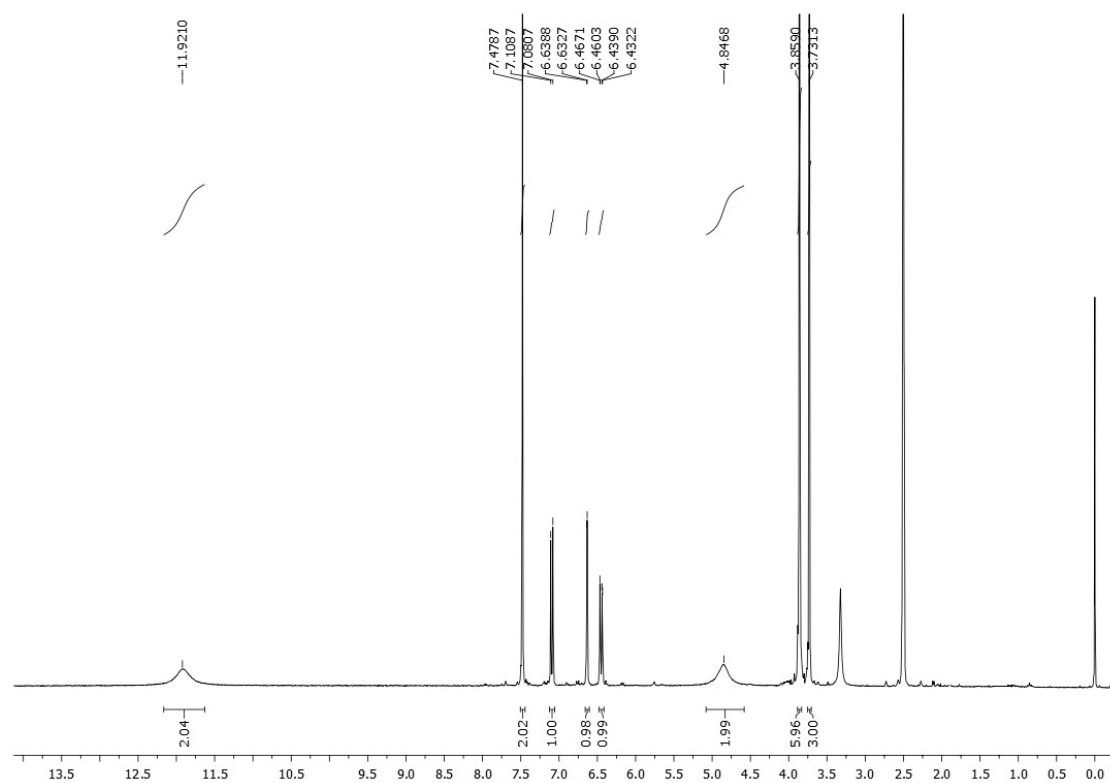

**Figure S17.**  $^1\text{H}$  NMR spectrum (DMSO- $d_6$ , 300 MHz) of *N*-[5(6)-aminobenzimidazol-2-yl]-3,4,5-trimethoxybenzamide **14**.

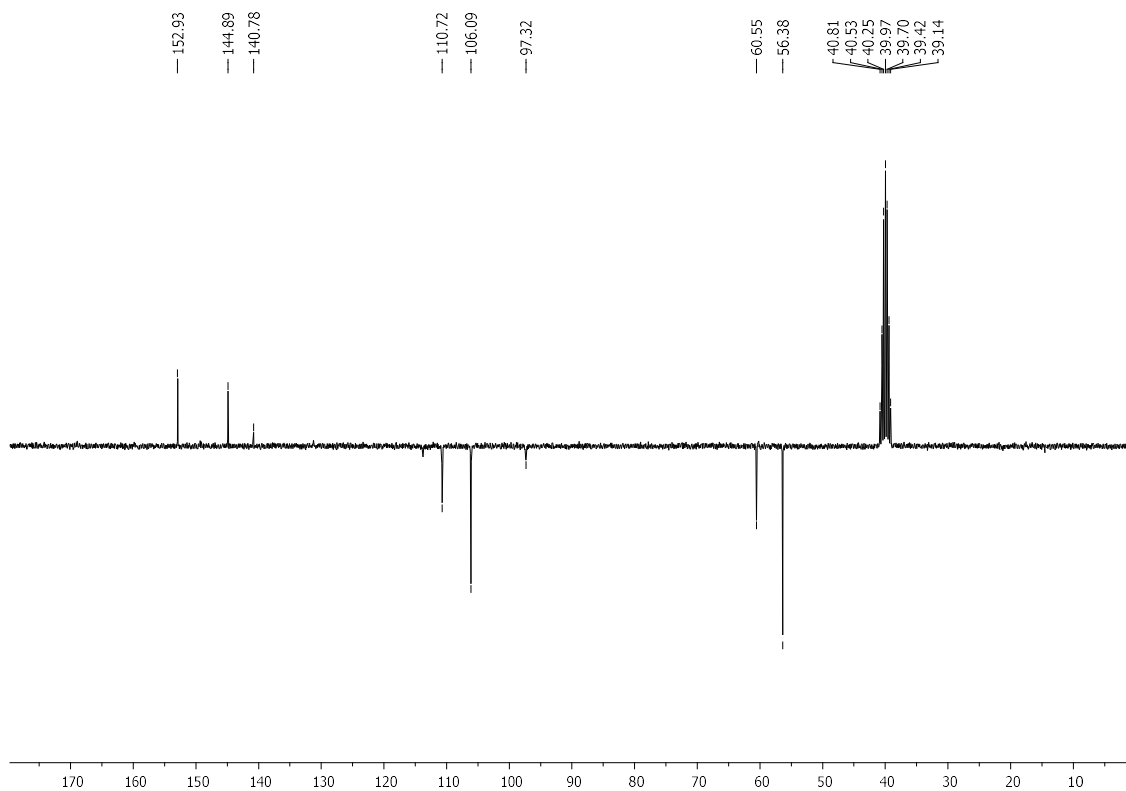

**Figure S18.**  $^{13}\text{C}$  NMR spectrum (DMSO- $d_6$ , 75 MHz) of *N*-[5(6)-aminobenzimidazol-2-yl]-3,4,5-trimethoxybenzamide **14**.

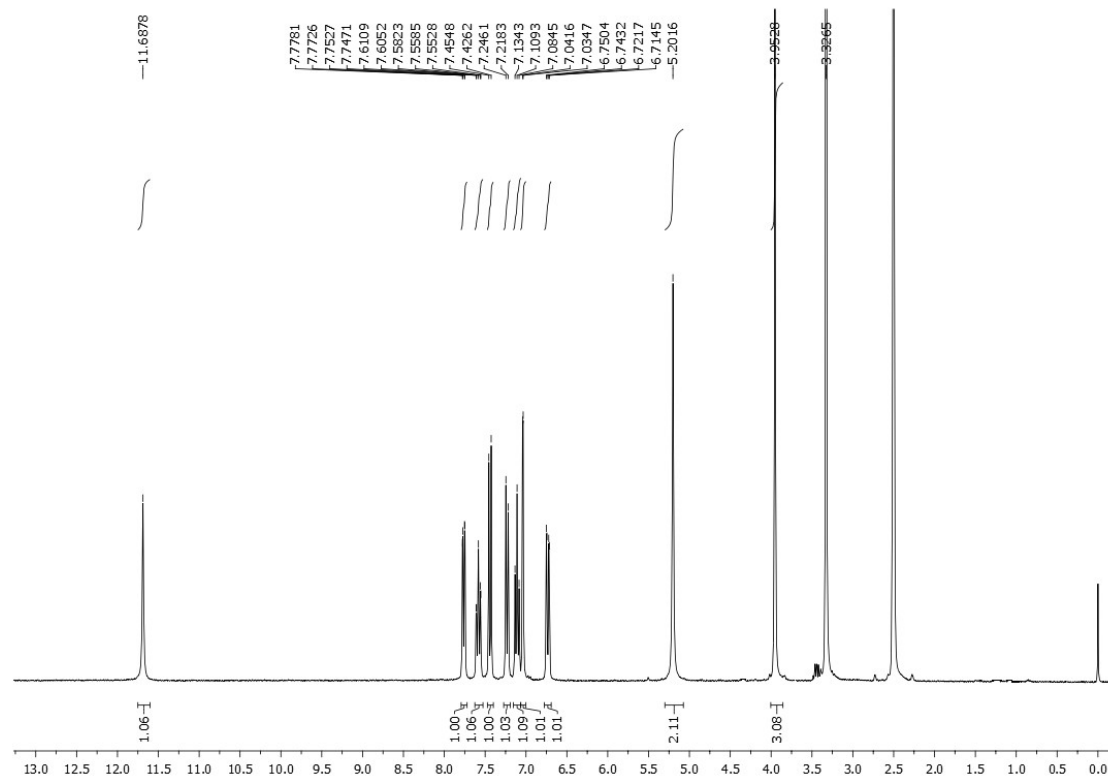

**Figure S19.**  $^1\text{H}$  NMR spectrum ( $\text{DMSO-}d_6$ , 300 MHz) of *N*-(6-aminobenzothiazol-2-yl)-2-methoxybenzamide **15**.

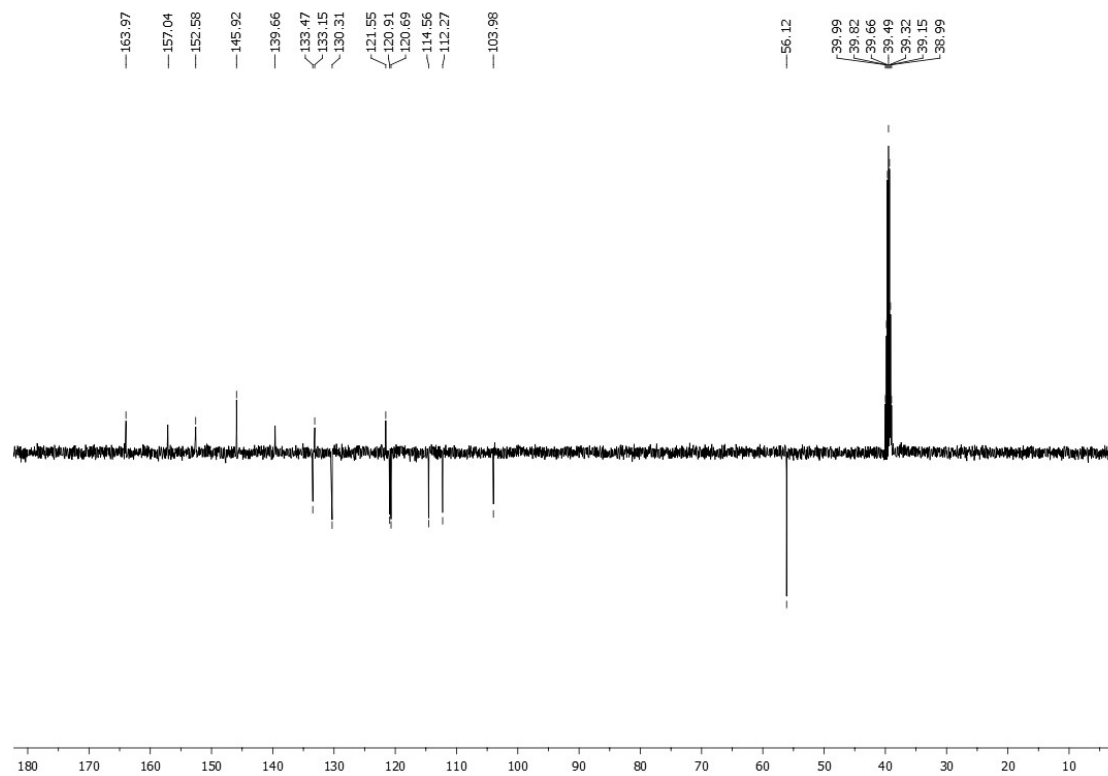

**Figure S20.**  $^{13}\text{C}$  NMR spectrum ( $\text{DMSO-}d_6$ , 125 MHz) of *N*-(6-aminobenzothiazol-2-yl)-2-methoxybenzamide **15**.

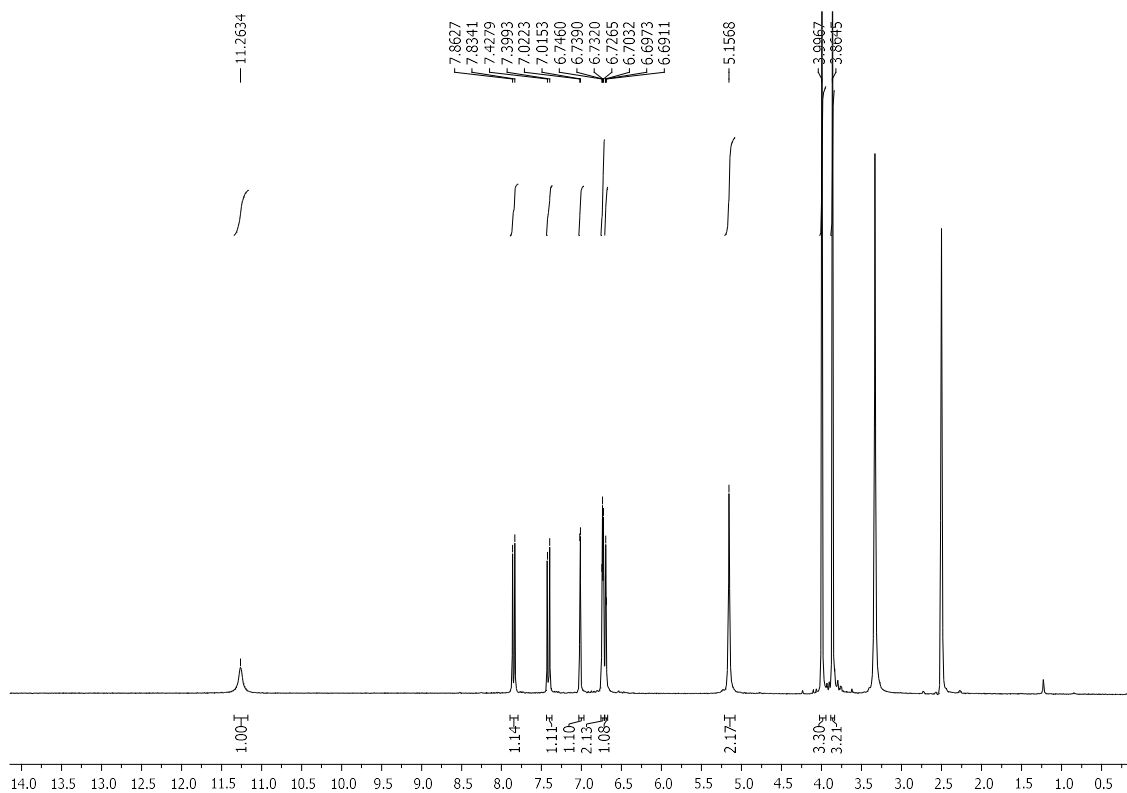

**Figure S21.**  $^1\text{H}$  NMR spectrum (DMSO- $d_6$ , 300 MHz) of *N*-(6-aminobenzothiazol-2-yl)-2,4-dimethoxybenzamide **16**.

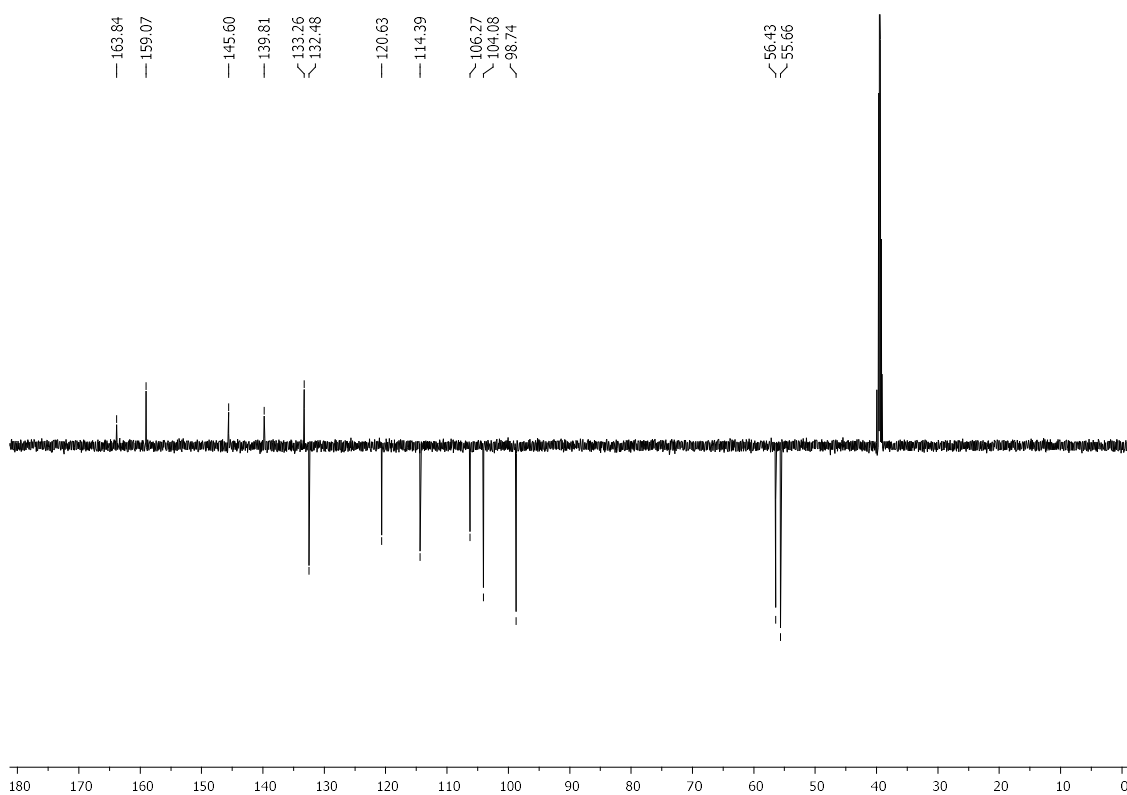

**Figure S22.**  $^{13}\text{C}$  NMR spectrum (DMSO- $d_6$ , 150 MHz) of *N*-(6-aminobenzothiazol-2-yl)-2,4-dimethoxybenzamide **16**.

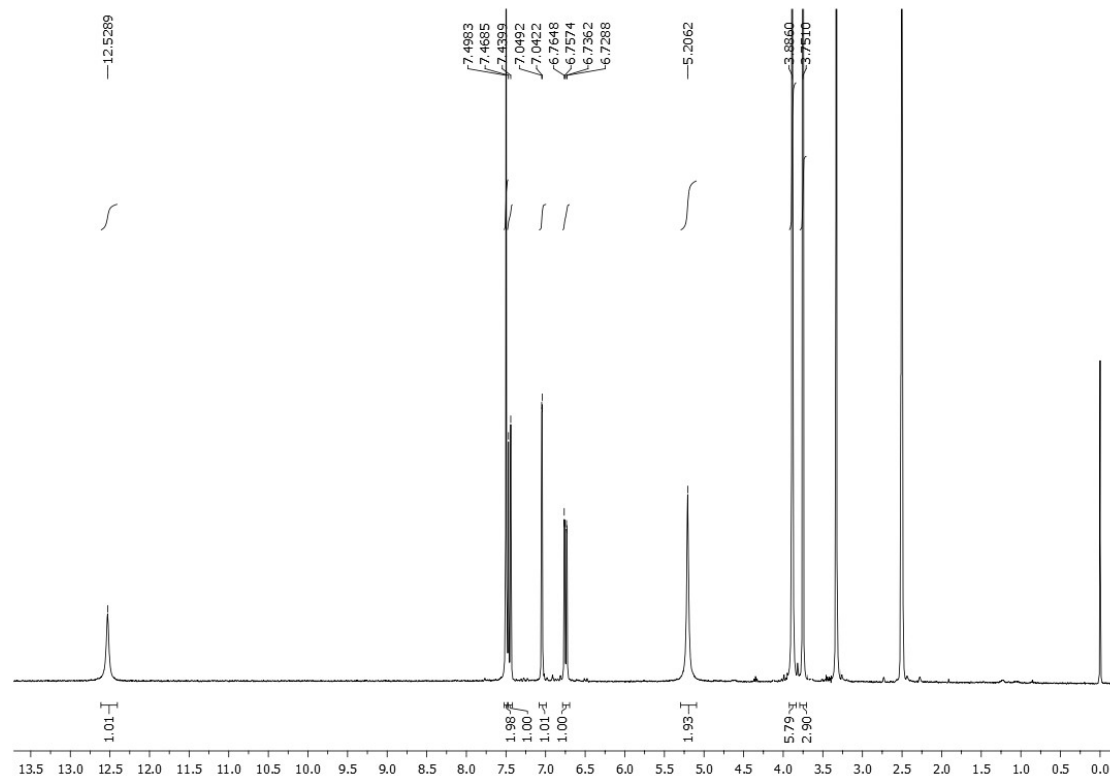

**Figure S23.**  $^1\text{H}$  NMR spectrum (DMSO- $d_6$ , 300 MHz) of *N*-(6-aminobenzothiazol-2-yl)-3,4,5-trimethoxybenzamide **17**.

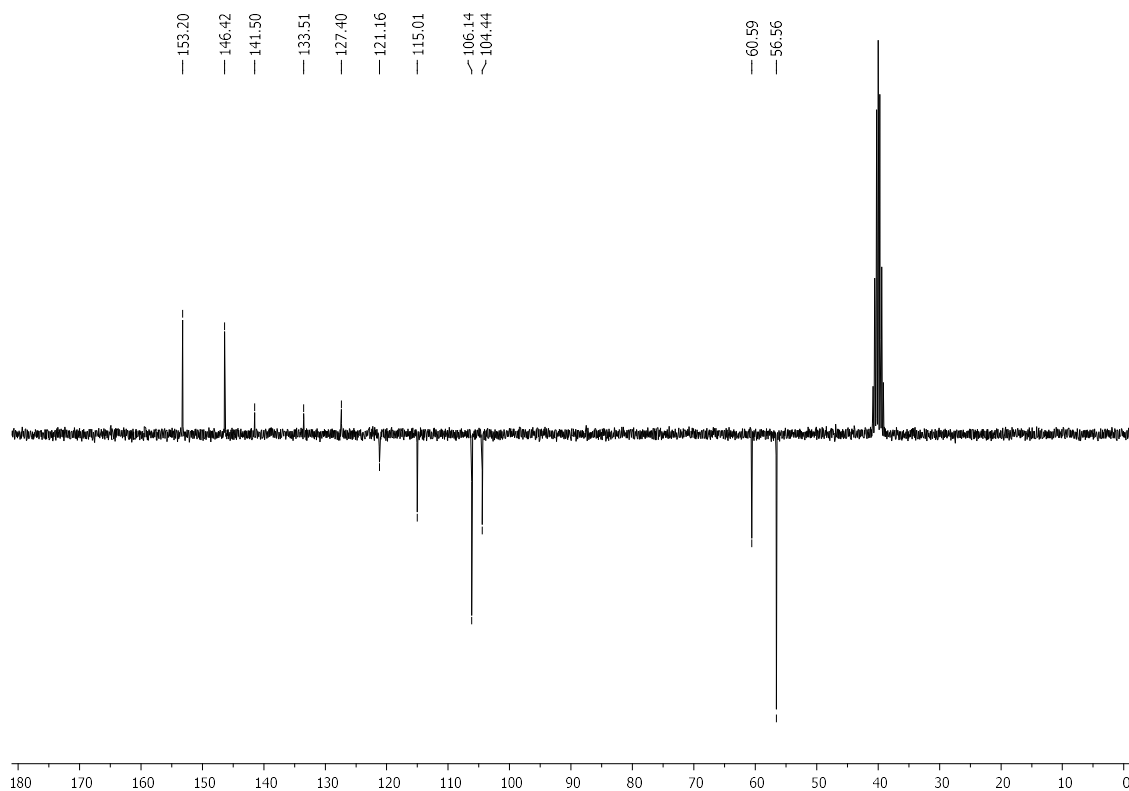

**Figure S24.**  $^{13}\text{C}$  NMR spectrum (DMSO- $d_6$ , 75 MHz) of *N*-(6-aminobenzothiazol-2-yl)-3,4,5-trimethoxybenzamide **17**.

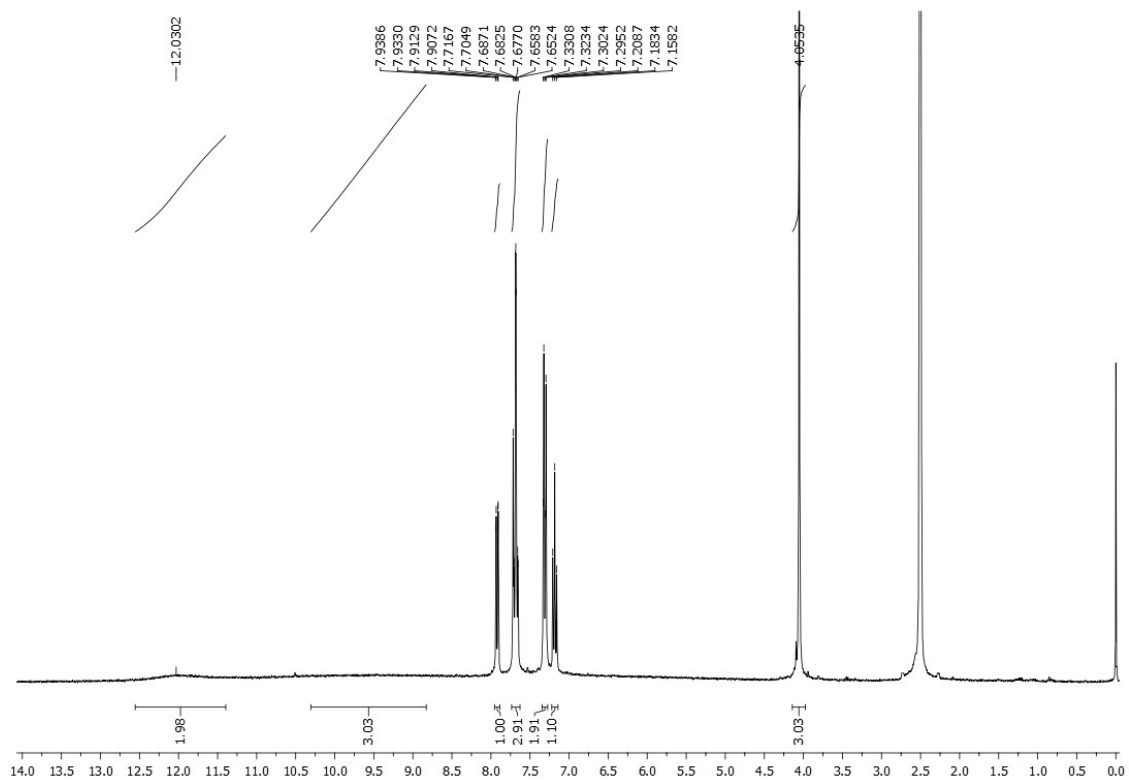

**Figure S25.**  $^1\text{H}$  NMR spectrum (DMSO- $d_6$ , 300 MHz) of *N*-[5(6)-aminobenzimidazol-2-yl]-2-methoxybenzamide hydrochloride **18**.

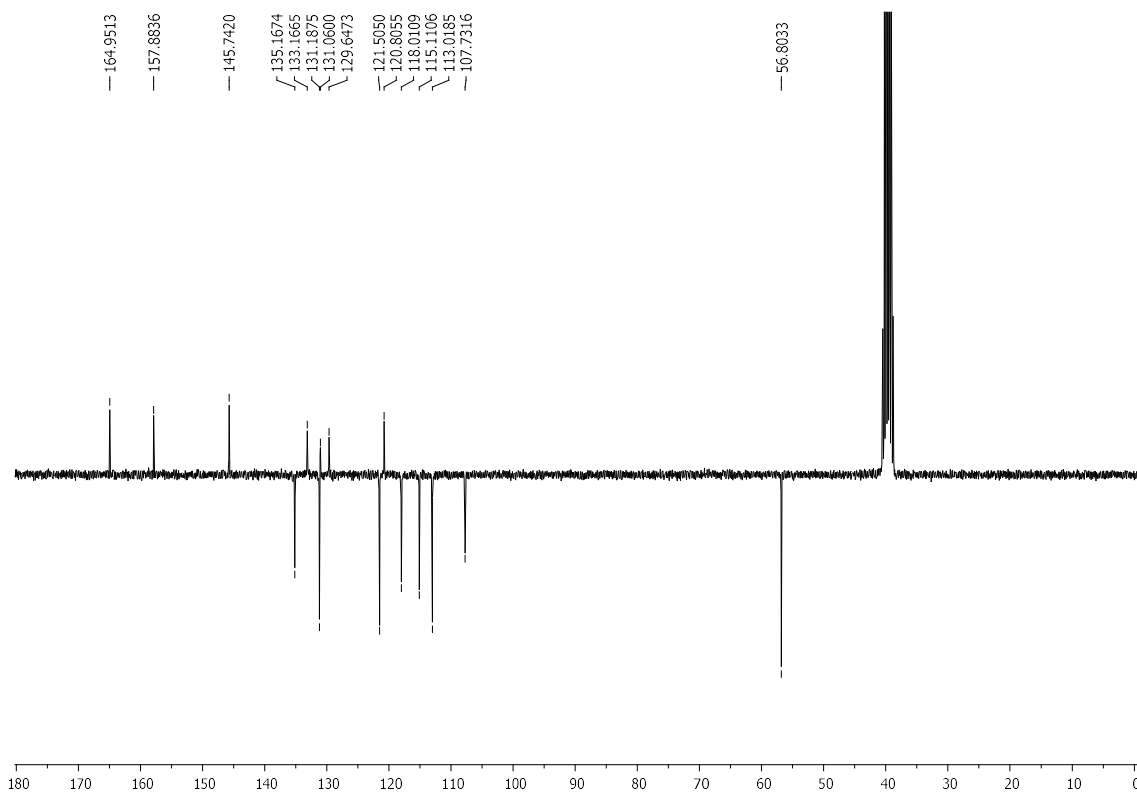

**Figure S26.**  $^{13}\text{C}$  NMR spectrum (DMSO- $d_6$ , 75 MHz) of *N*-[5(6)-aminobenzimidazol-2-yl]-2-methoxybenzamide hydrochloride **18**.

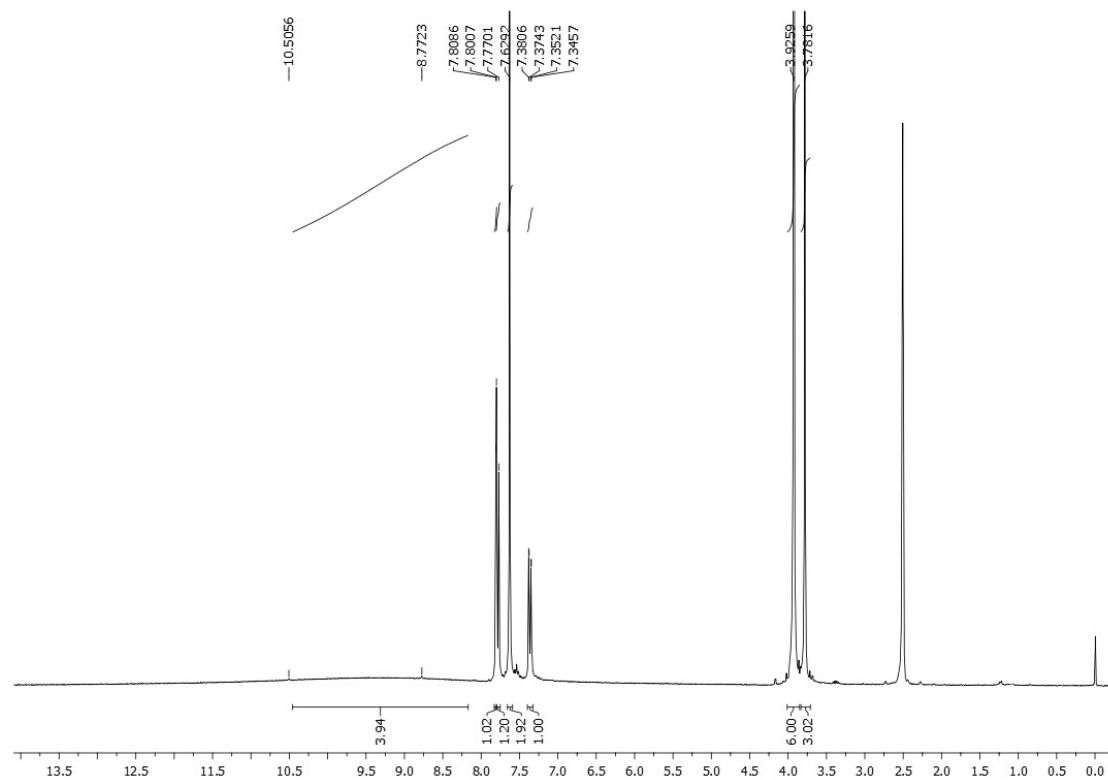

**Figure S27.**  $^1\text{H}$  NMR spectrum ( $\text{DMSO-}d_6$ , 300 MHz) of *N*-(6-aminobenzimidazol-2-yl)-3,4,5-trimethoxybenzamide hydrochloride **20**.

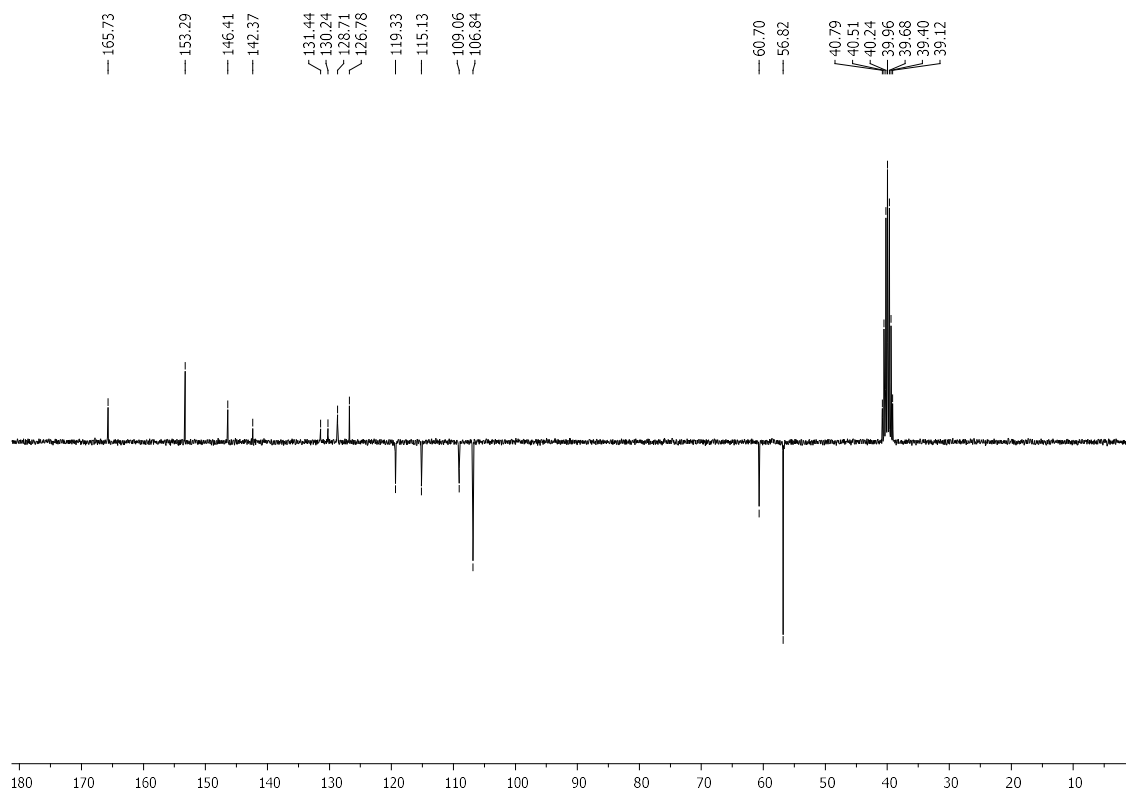

**Figure S28.**  $^{13}\text{C}$  NMR spectrum ( $\text{DMSO-}d_6$ , 75 MHz) of *N*-(6-aminobenzimidazol-2-yl)-3,4,5-trimethoxybenzamide hydrochloride **20**.

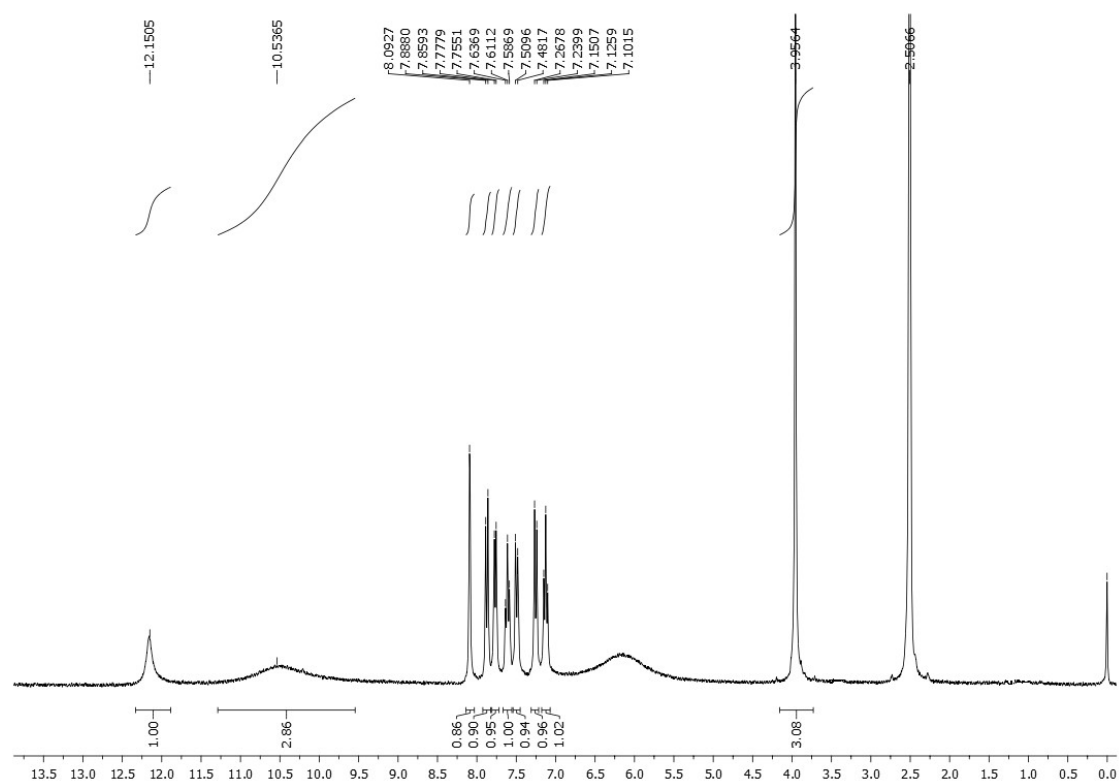

**Figure S29.**  $^1\text{H}$  NMR spectrum (DMSO- $d_6$ , 300 MHz) of *N*-(6-aminobenzothiazol-2-yl)-2-methoxybenzamide hydrochloride **21**.

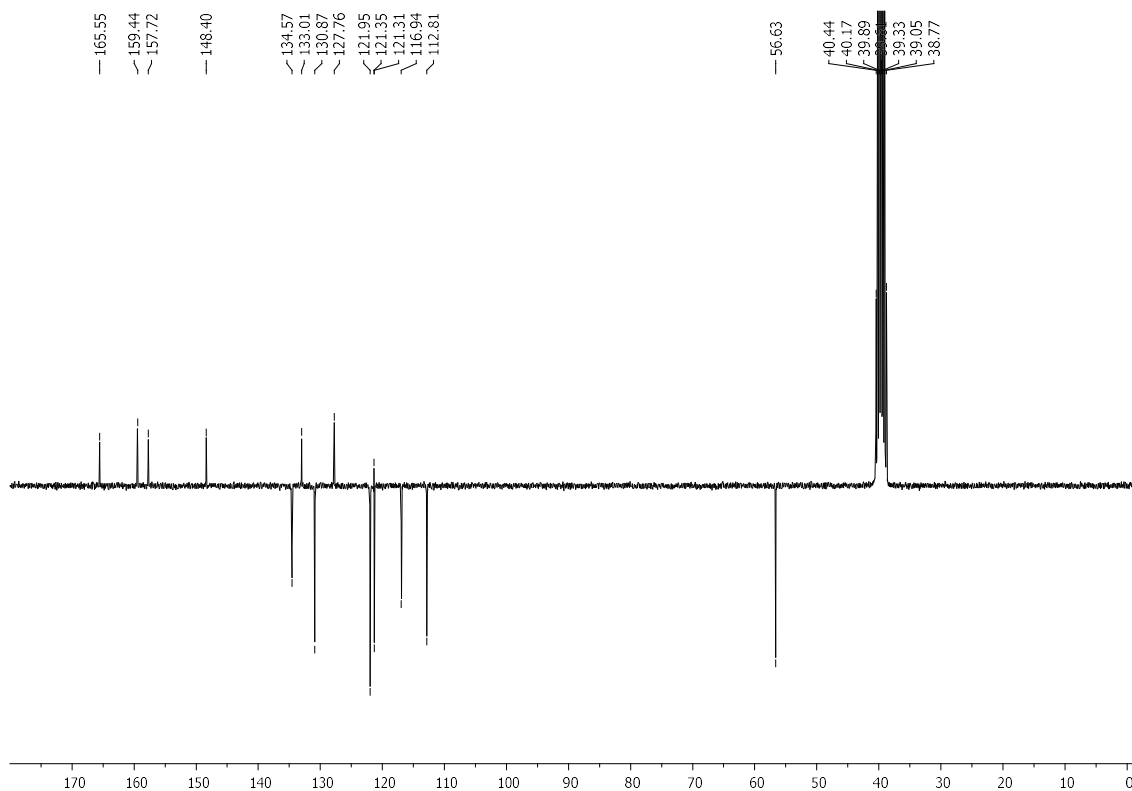

**Figure S30.**  $^{13}\text{C}$  NMR spectrum (DMSO- $d_6$ , 75 MHz) of *N*-(6-aminobenzothiazol-2-yl)-2-methoxybenzamide hydrochloride **21**.



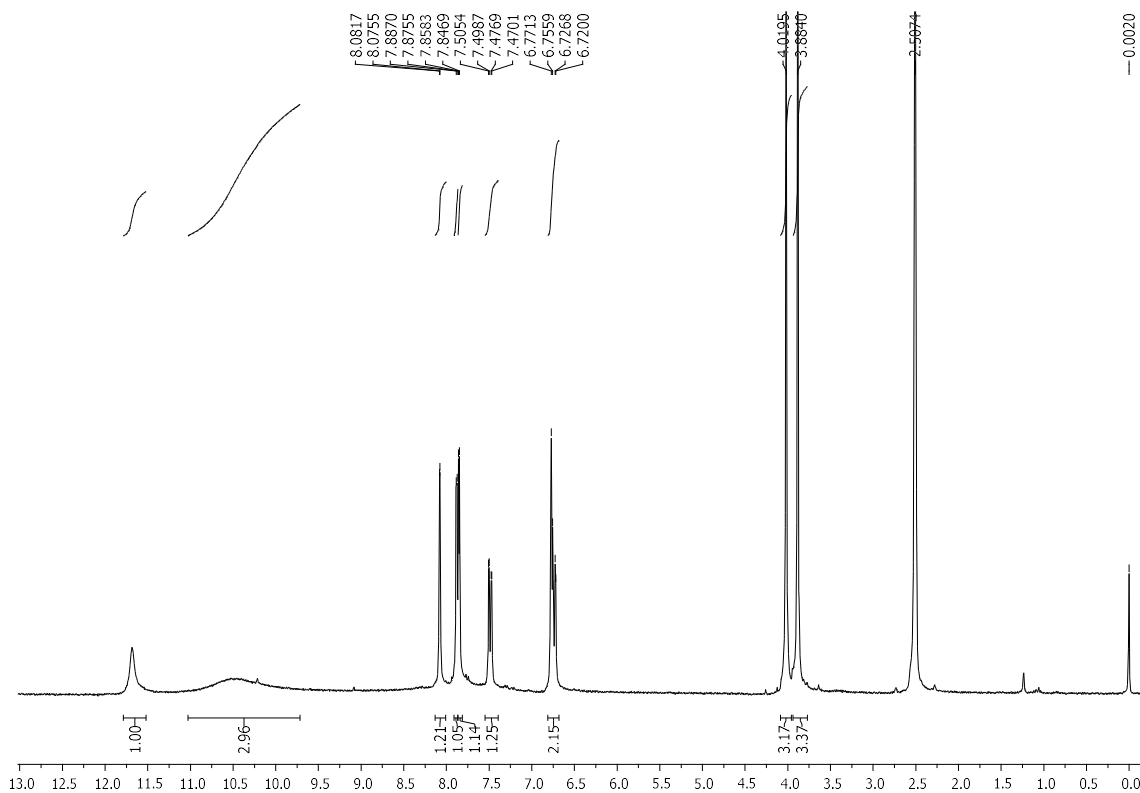

**Figure S31.**  $^1\text{H}$  NMR spectrum ( $\text{DMSO-}d_6$ , 300 MHz) of *N*-(6-aminobenzothiazol-2-yl)-2,4-dimethoxybenzamide hydrochloride **22**.

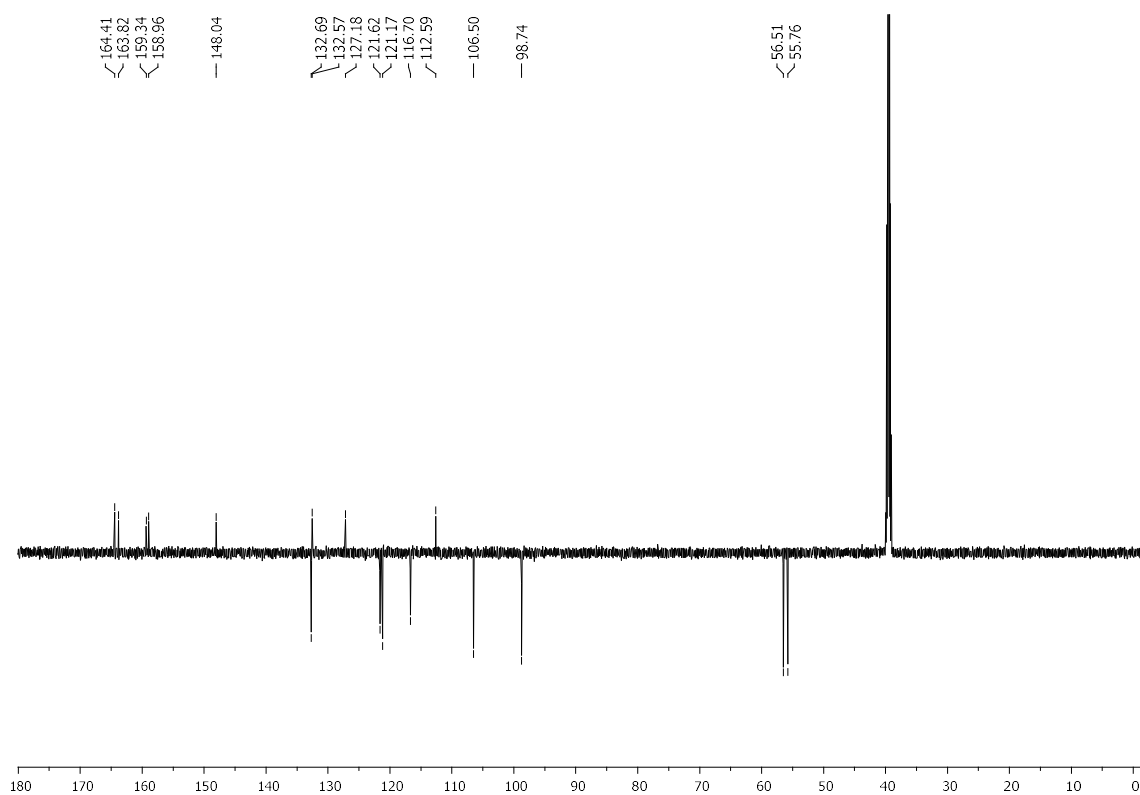

**Figure S32.**  $^{13}\text{C}$  NMR spectrum ( $\text{DMSO-}d_6$ , 150 MHz) of *N*-(6-aminobenzothiazol-2-yl)-2,4-dimethoxybenzamide hydrochloride **22**.

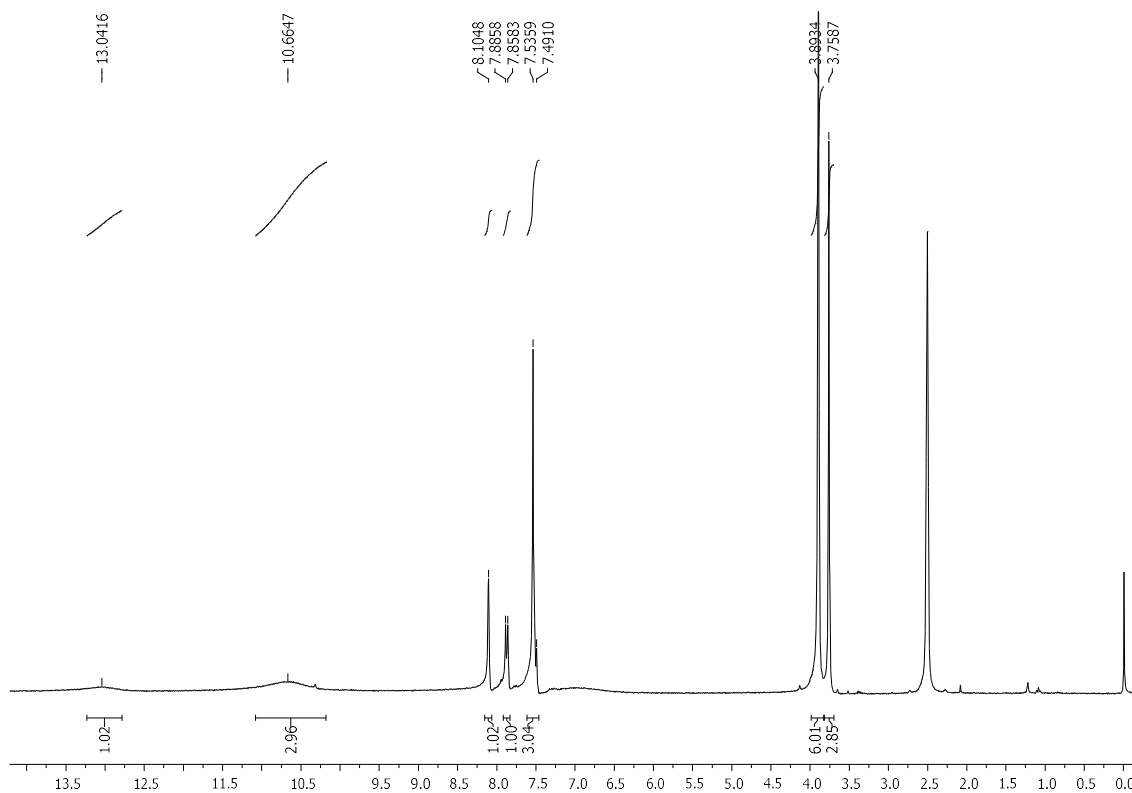

**Figure S33.**  $^1\text{H}$  NMR spectrum (DMSO- $d_6$ , 300 MHz) of *N*-(6-aminobenzothiazol-2-yl)-3,4,5-trimethoxybenzamide hydrochloride **23**.

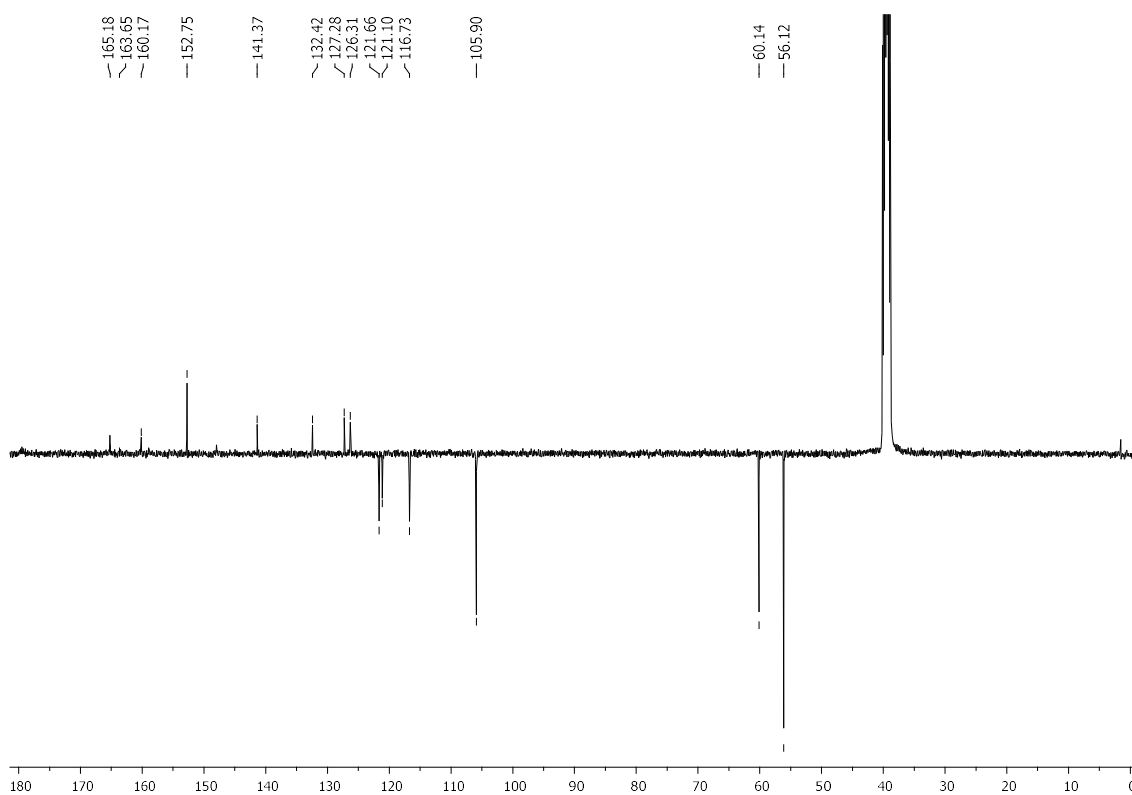

**Figure S34.**  $^{13}\text{C}$  NMR spectrum (DMSO- $d_6$ , 100 MHz) of *N*-(6-aminobenzothiazol-2-yl)-3,4,5-trimethoxybenzamide hydrochloride **23**.

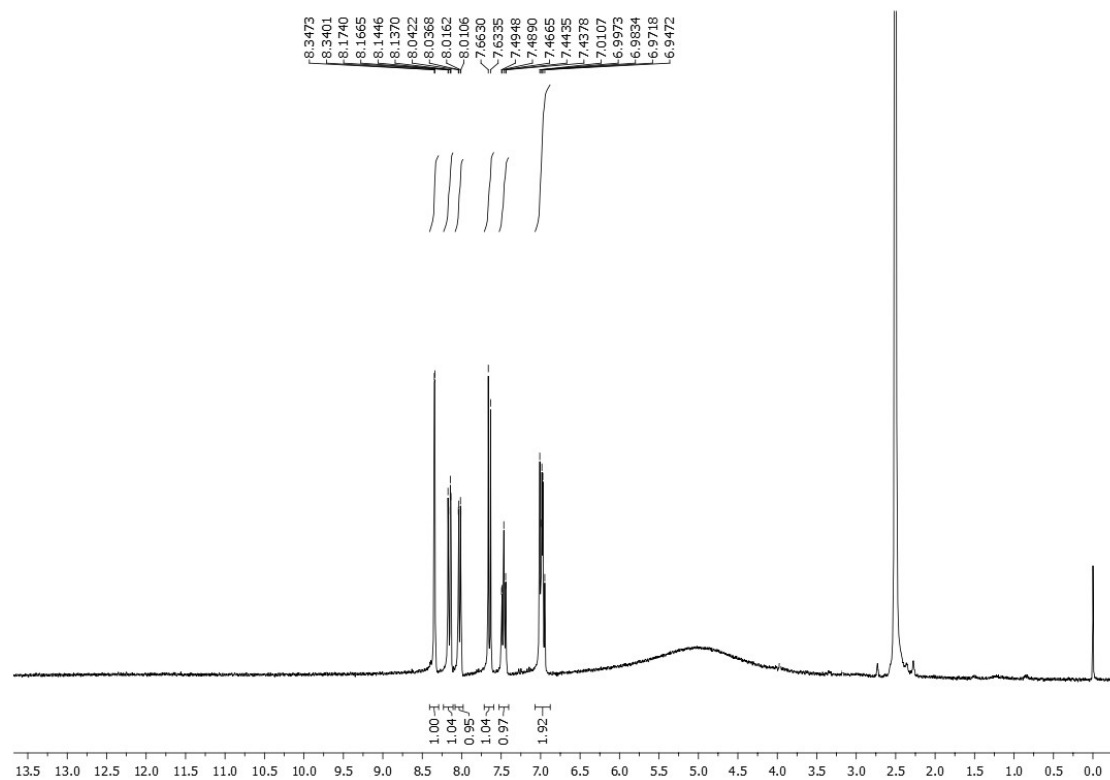

**Figure S35.**  $^1\text{H}$  NMR spectrum (DMSO- $d_6$ , 300 MHz) of *2-hydroxy-N-[5(6)-nitrobenzimidazol-2-yl]benzamide 24*.

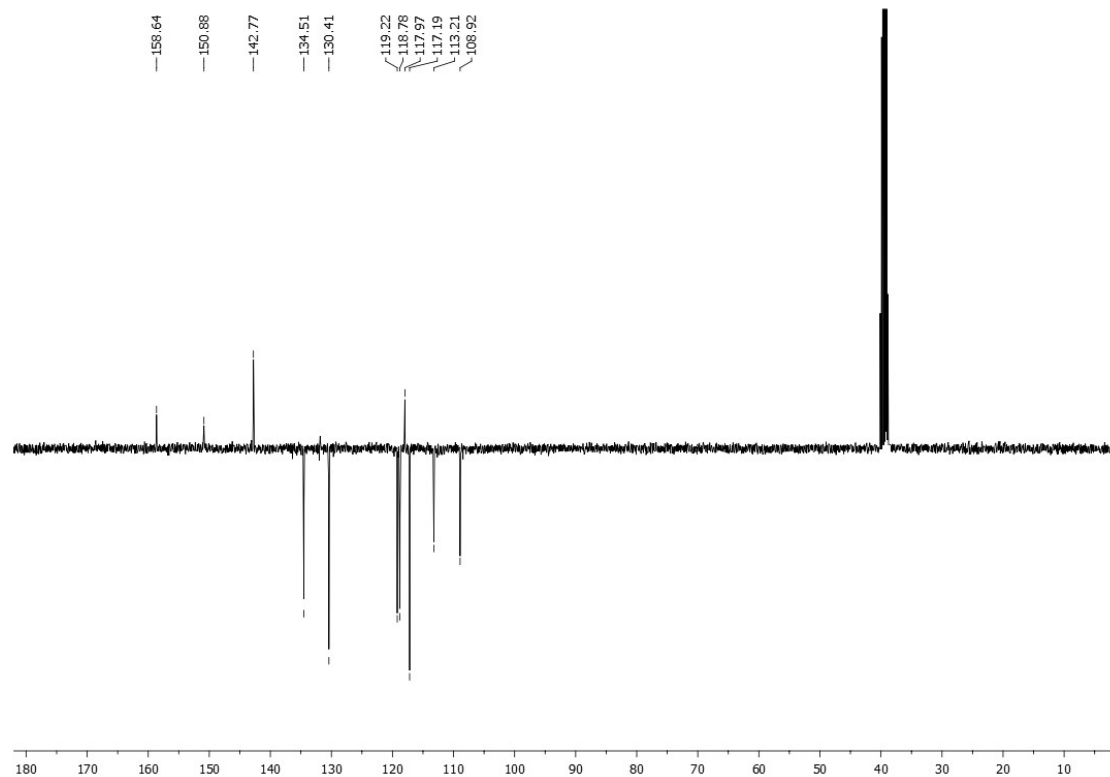

**Figure S36.**  $^{13}\text{C}$  NMR spectrum (DMSO- $d_6$ , 100 MHz) of *2-hydroxy-N-[5(6)-nitrobenzimidazol-2-yl]benzamide 24*.

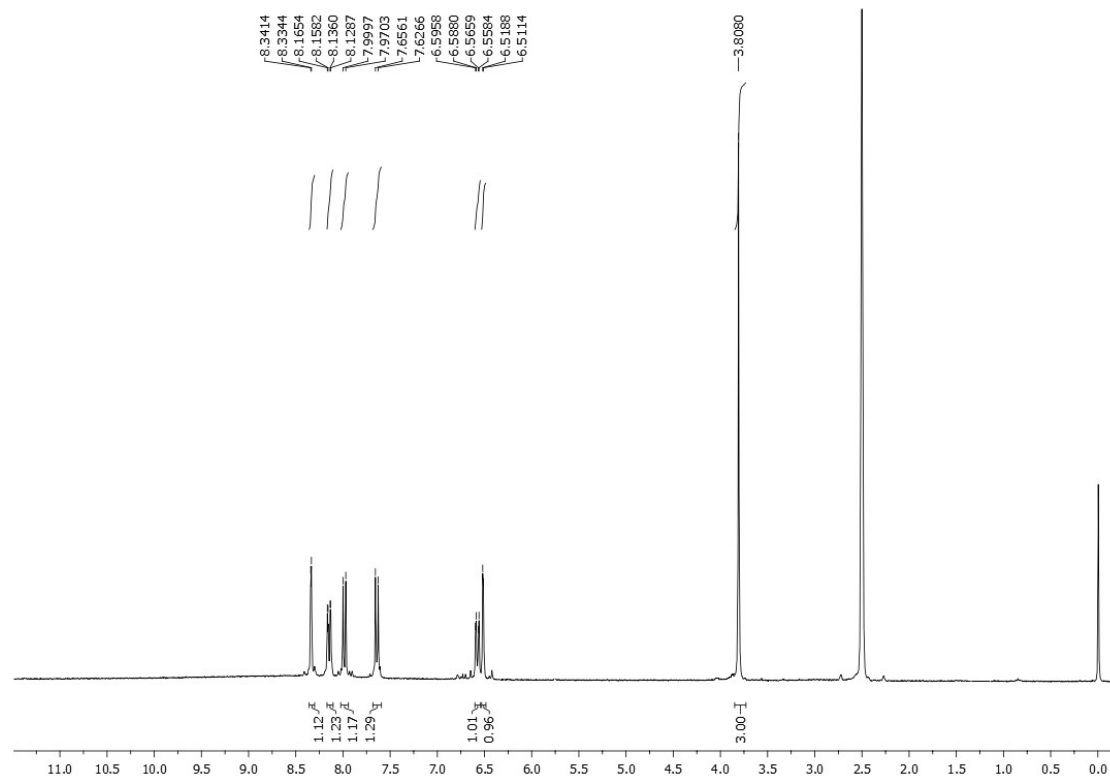

**Figure S37.**  $^1\text{H}$  NMR spectrum (DMSO- $d_6$ , 300 MHz) of *2-hydroxy-4-methoxy-N-[5(6)-nitrobenzimidazol-2-yl]benzamide 25*.

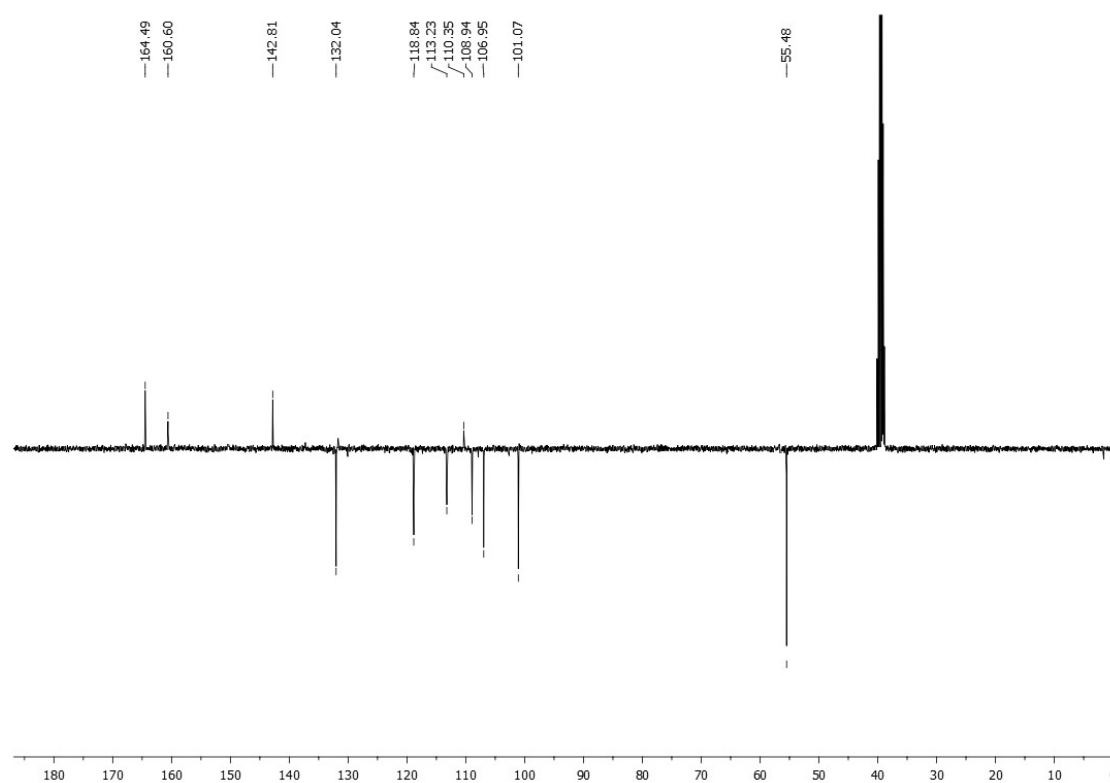

**Figure S38.**  $^{13}\text{C}$  NMR spectrum (DMSO- $d_6$ , 100 MHz) of *2-hydroxy-4-methoxy-N-[5(6)-nitrobenzimidazol-2-yl]benzamide 25*.

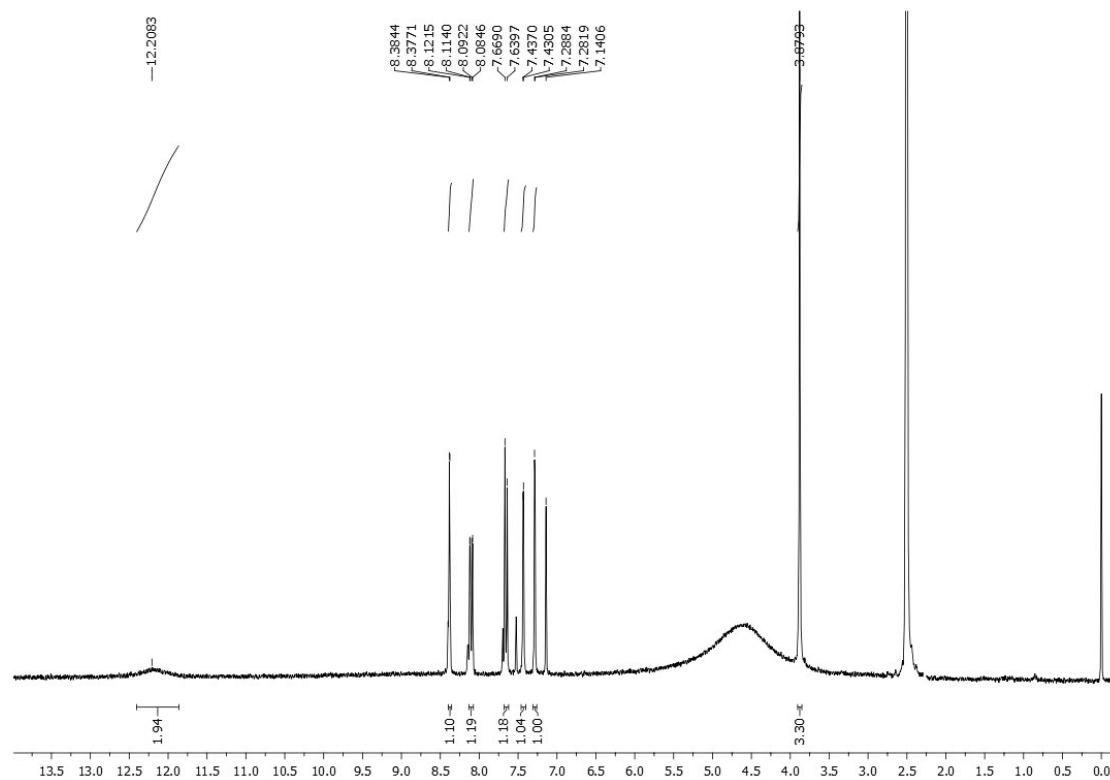

**Figure S39.**  $^1\text{H}$  NMR spectrum (DMSO- $d_6$ , 300 MHz) of *3,5-dihydroxy-4-methoxy-N-[5(6)-nitrobenzimidazol-2-yl]benzamide 26*.

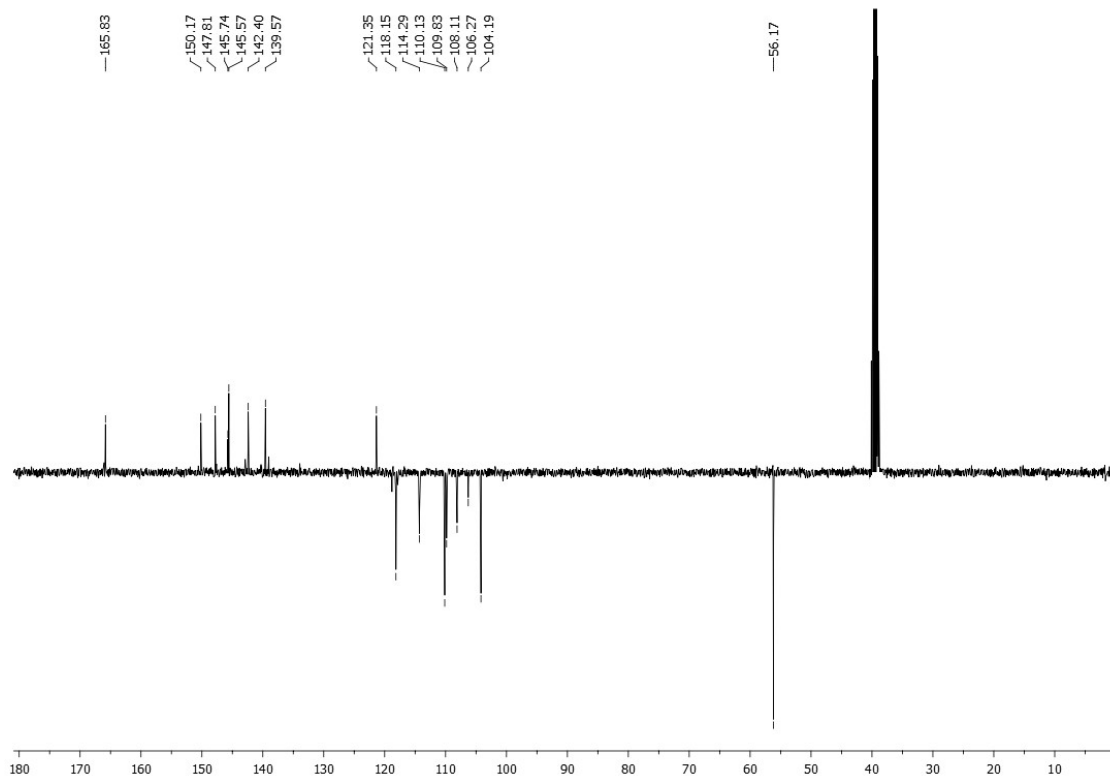

**Figure S40.**  $^{13}\text{C}$  NMR spectrum (DMSO- $d_6$ , 100 MHz) of *3,5-dihydroxy-4-methoxy-N-[5(6)-nitrobenzimidazol-2-yl]benzamide 26*.

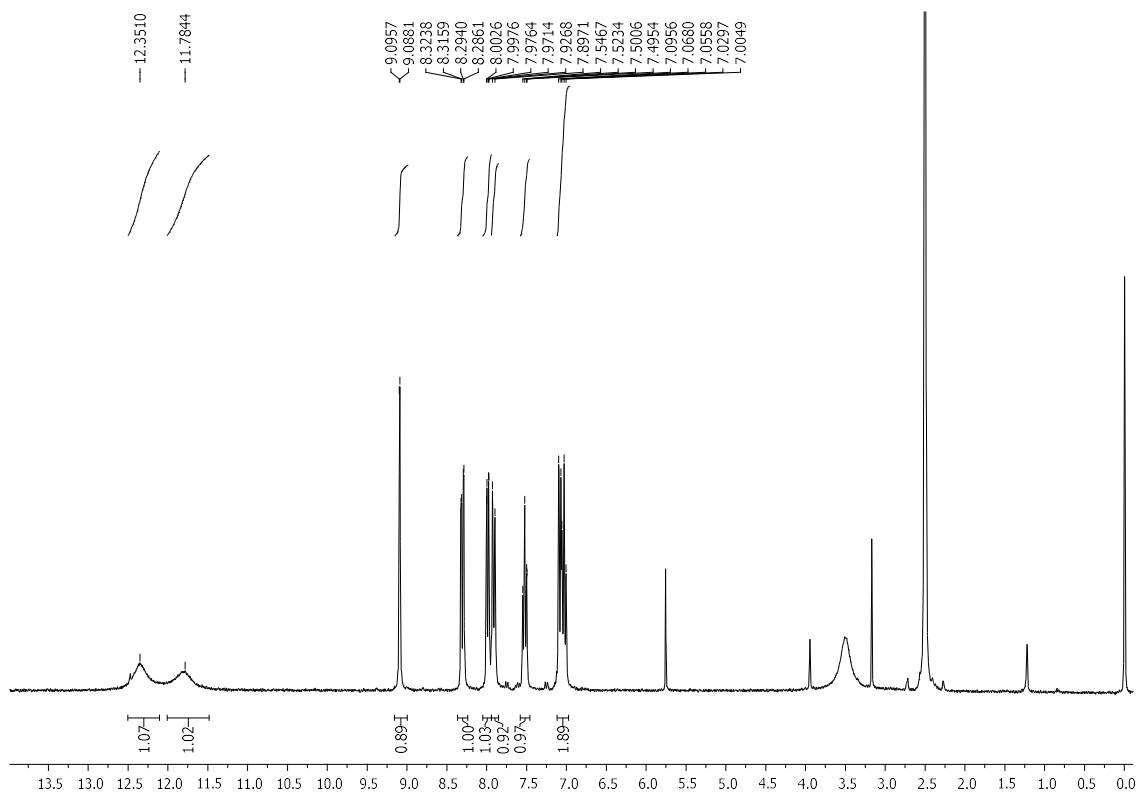

**Figure S41.**  $^1\text{H}$  NMR spectrum ( $\text{DMSO-}d_6$ , 300 MHz) of *2-hydroxy-N-(6-nitrobenzothiazol-2-yl)benzamide 27*.

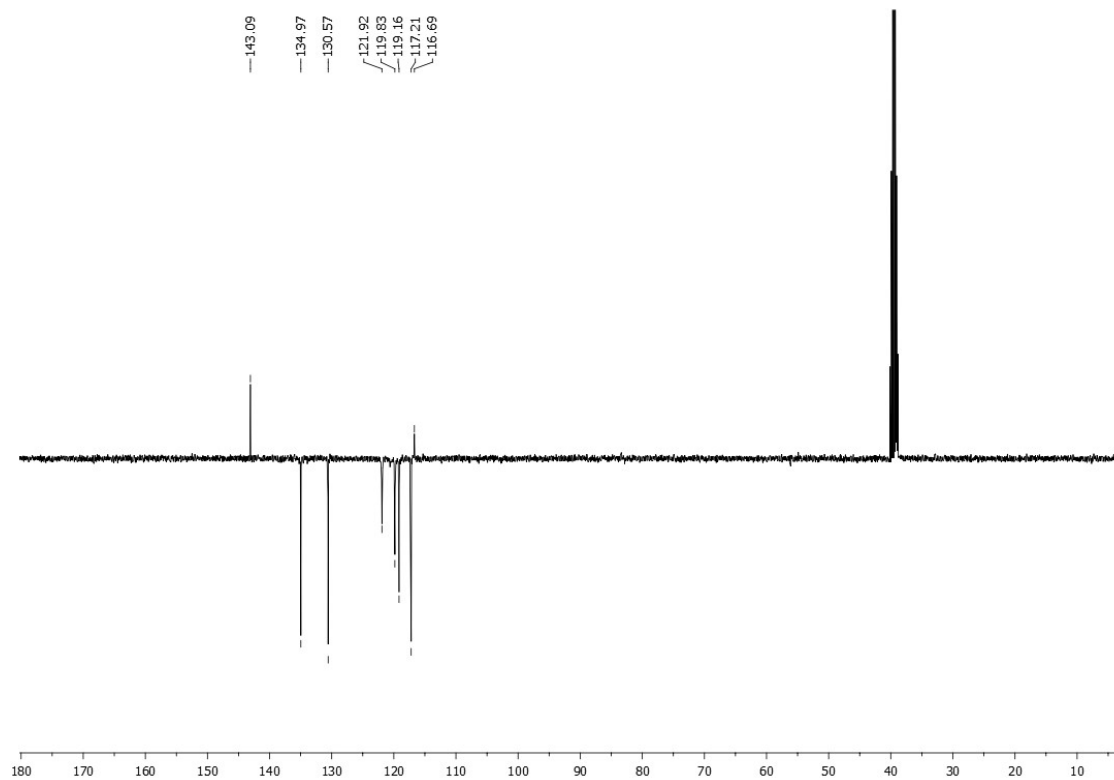

**Figure S42.**  $^{13}\text{C}$  NMR spectrum ( $\text{DMSO-}d_6$ , 100 MHz) of *2-hydroxy-N-(6-nitrobenzothiazol-2-yl)benzamide 27*.

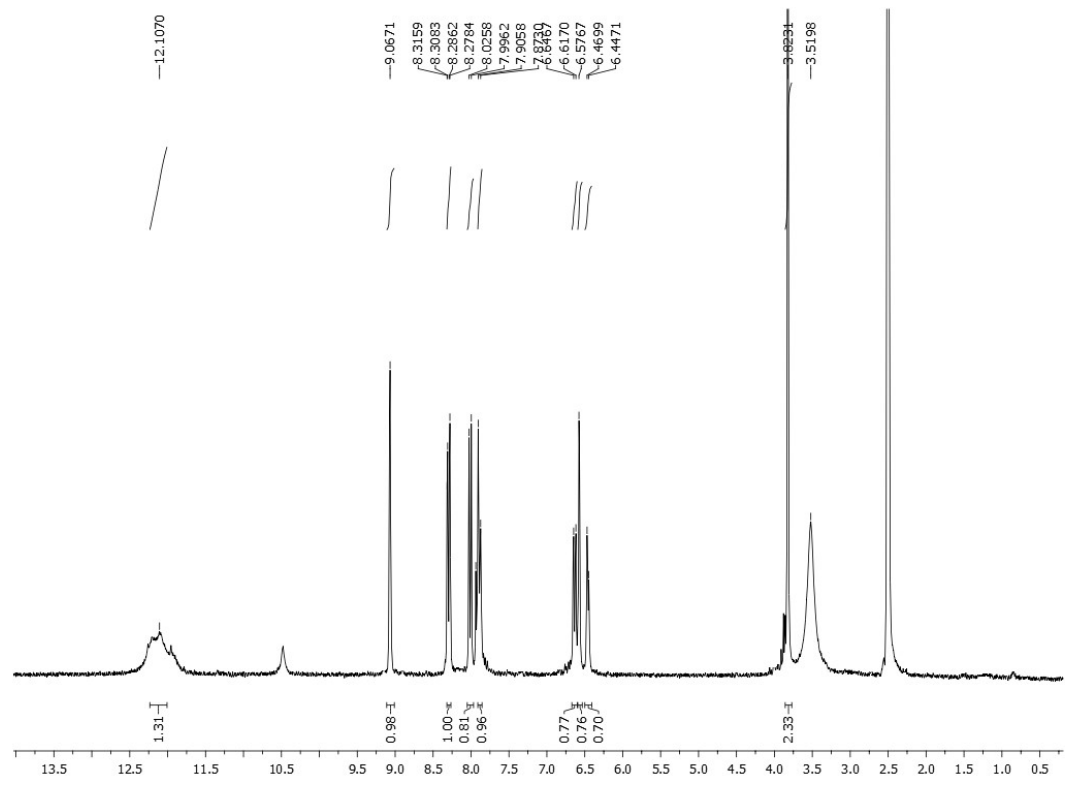

Figure S43.  $^1\text{H}$  NMR spectrum (DMSO- $d_6$ , 300 MHz) of *2-hydroxy-4-methoxy-N-(6-nitrobenzothiazol-2-yl)benzamide 28*.

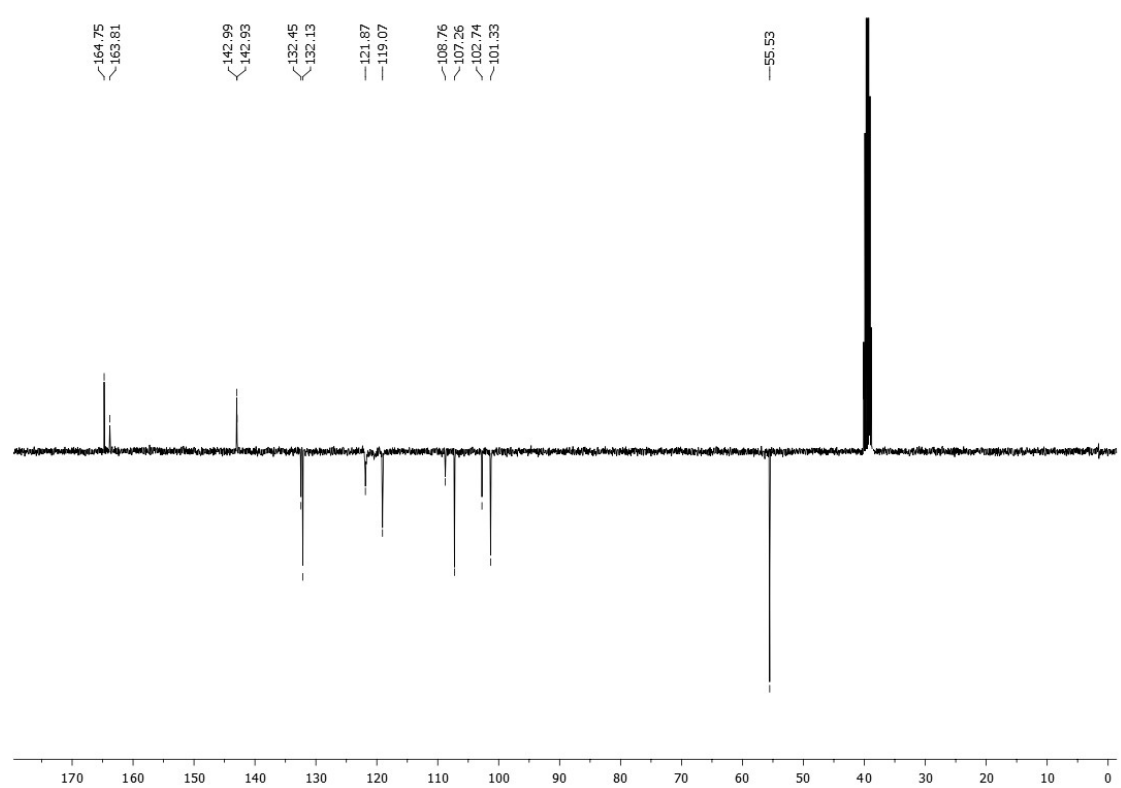

Figure S44.  $^{13}\text{C}$  NMR spectrum (DMSO- $d_6$ , 100 MHz) of *2-hydroxy-4-methoxy-N-(6-nitrobenzothiazol-2-yl)benzamide 28*.

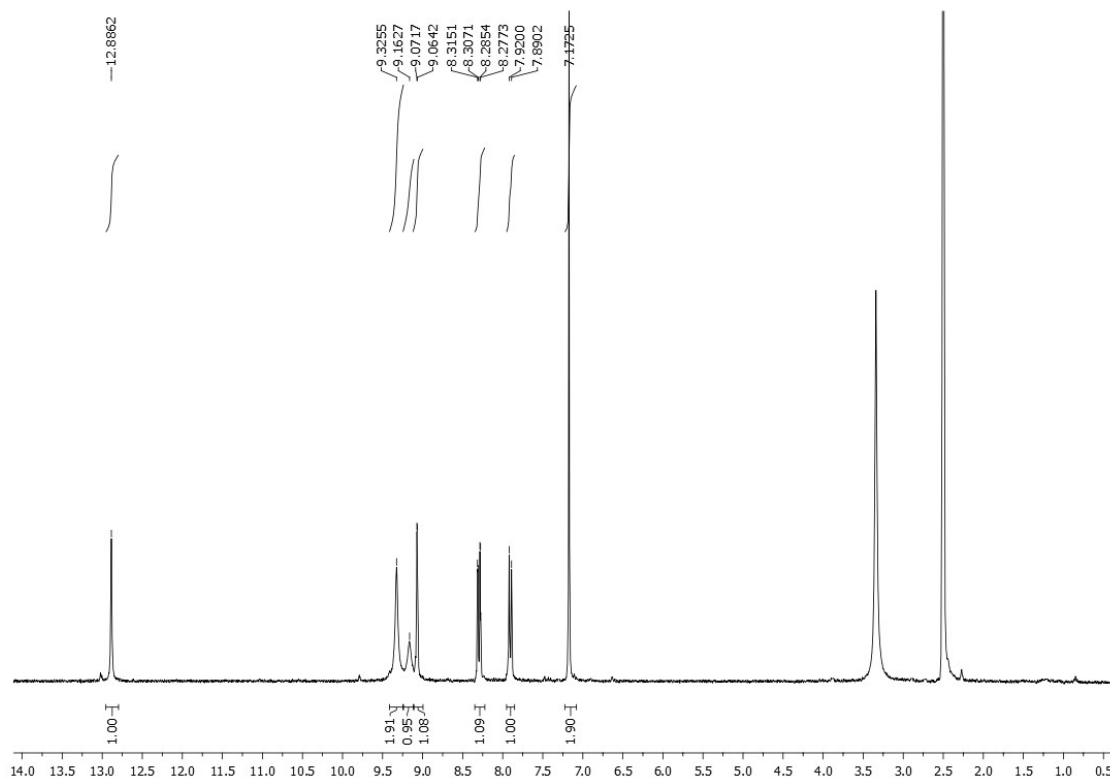

**Figure S45.**  $^1\text{H}$  NMR spectrum (DMSO- $d_6$ , 300 MHz) of *3,4,5-trihydroxy-N-(6-nitrobenzothiazol-2-yl)benzamide 29*.

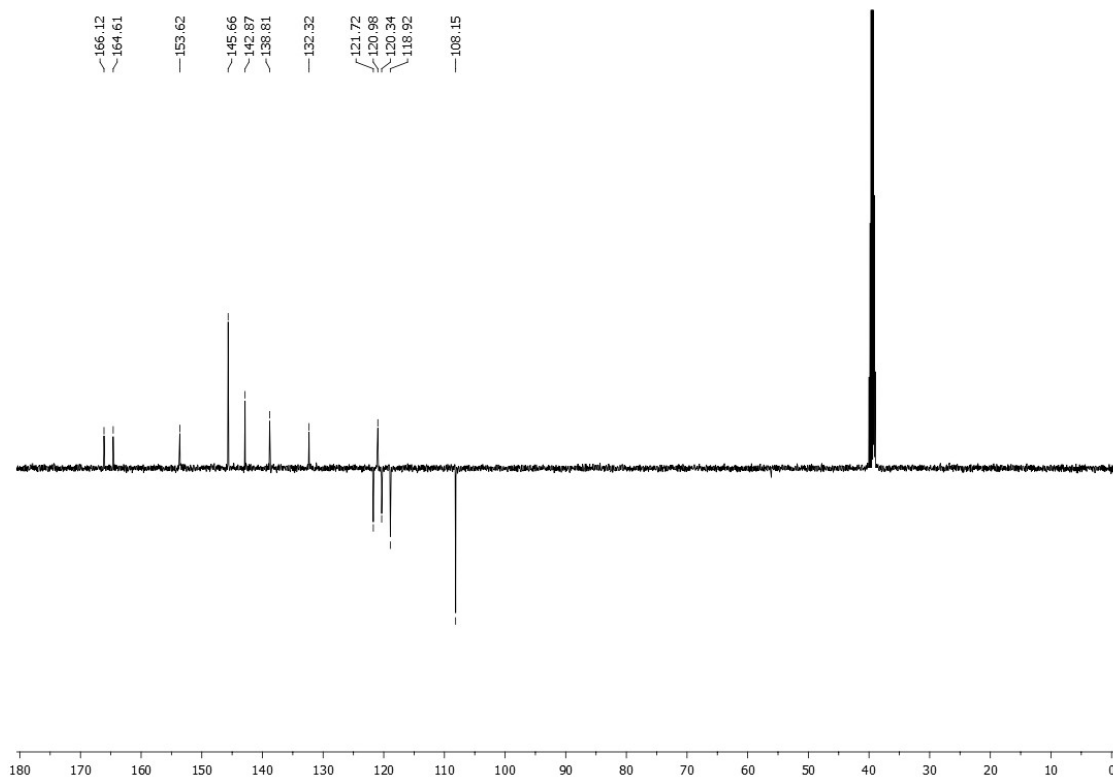

**Figure S46.**  $^{13}\text{C}$  NMR spectrum (DMSO- $d_6$ , 125 MHz) of *3,4,5-trihydroxy-N-(6-nitrobenzothiazol-2-yl)benzamide 29*.



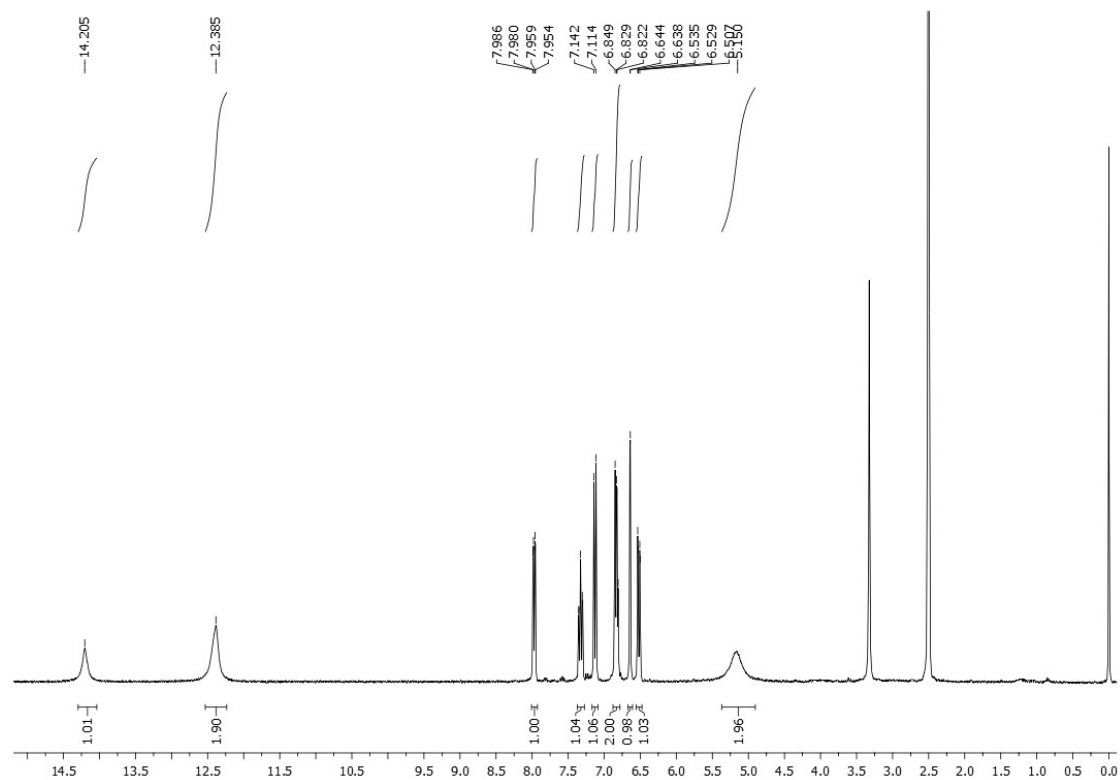

**Figure S47.**  $^1\text{H}$  NMR spectrum (DMSO- $d_6$ , 300 MHz) of *N*-[5(6)-aminobenzimidazol-2-yl]-2-hydroxybenzamide **30**.

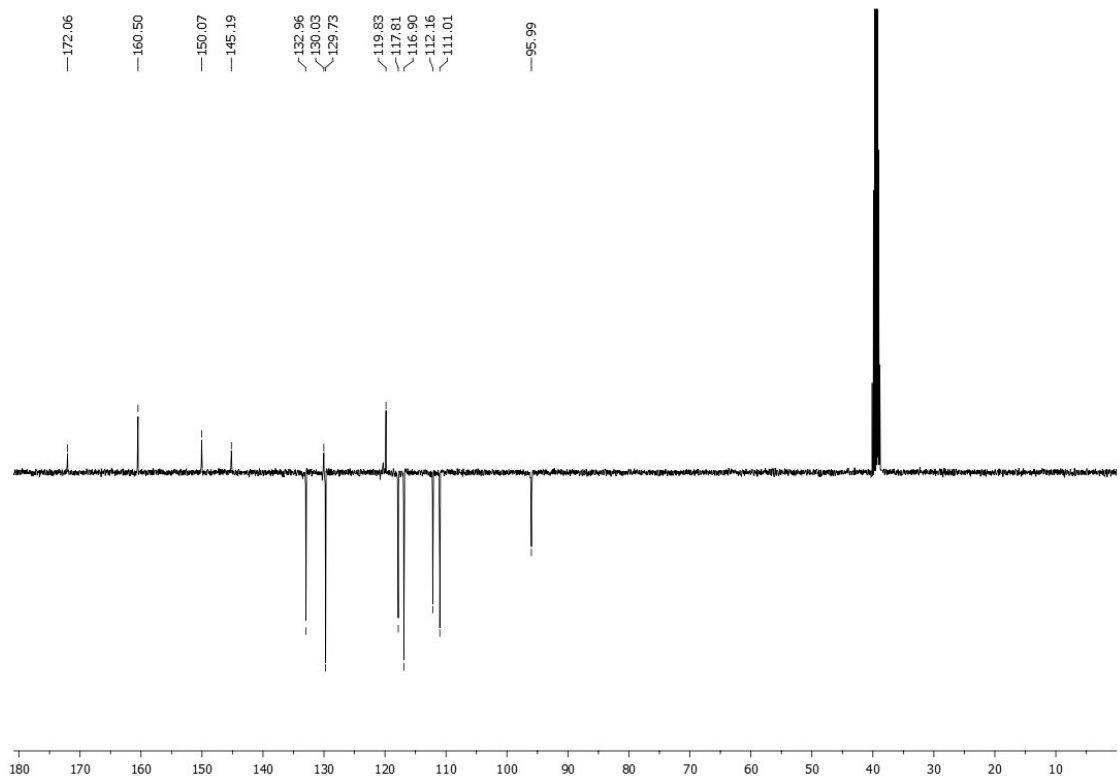

**Figure S48.**  $^{13}\text{C}$  NMR spectrum (DMSO- $d_6$ , 100 MHz) of *N*-[5(6)-aminobenzimidazol-2-yl]-2-hydroxybenzamide **30**.

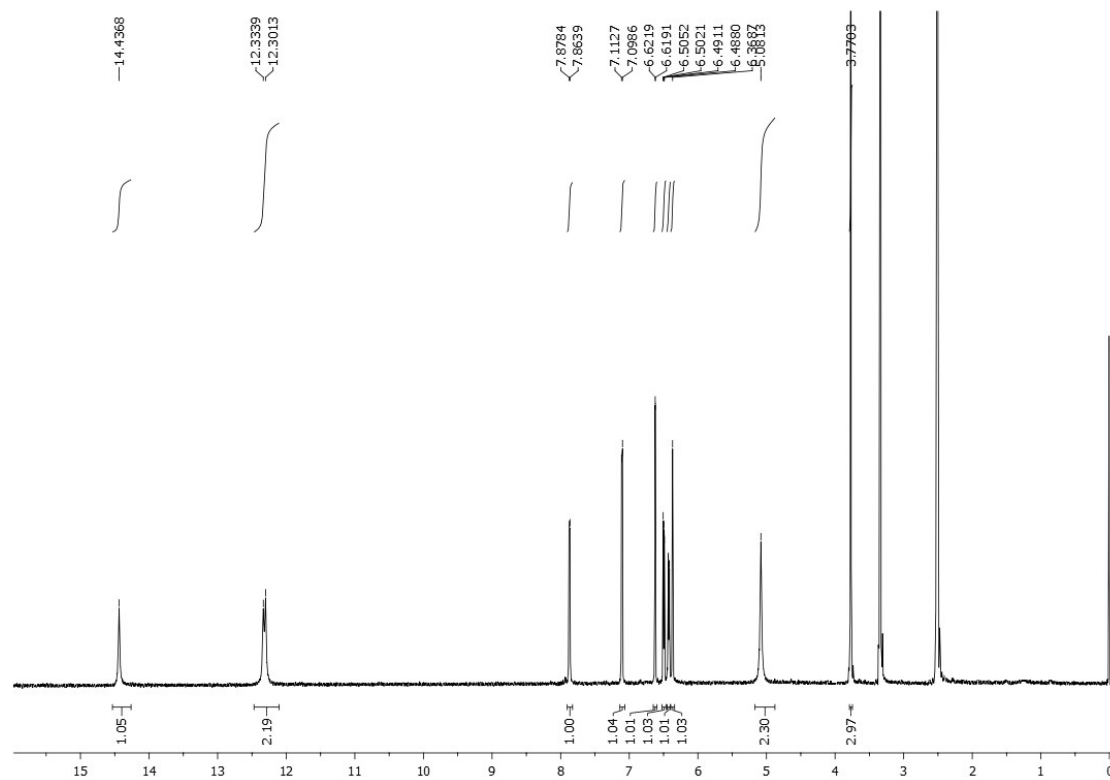

**Figure S49.**  $^1\text{H}$  NMR spectrum (DMSO- $d_6$ , 300 MHz) of *N*-[5(6)-aminobenzimidazol-2-yl]-2-hydroxy-4-methoxybenzamide **31**.

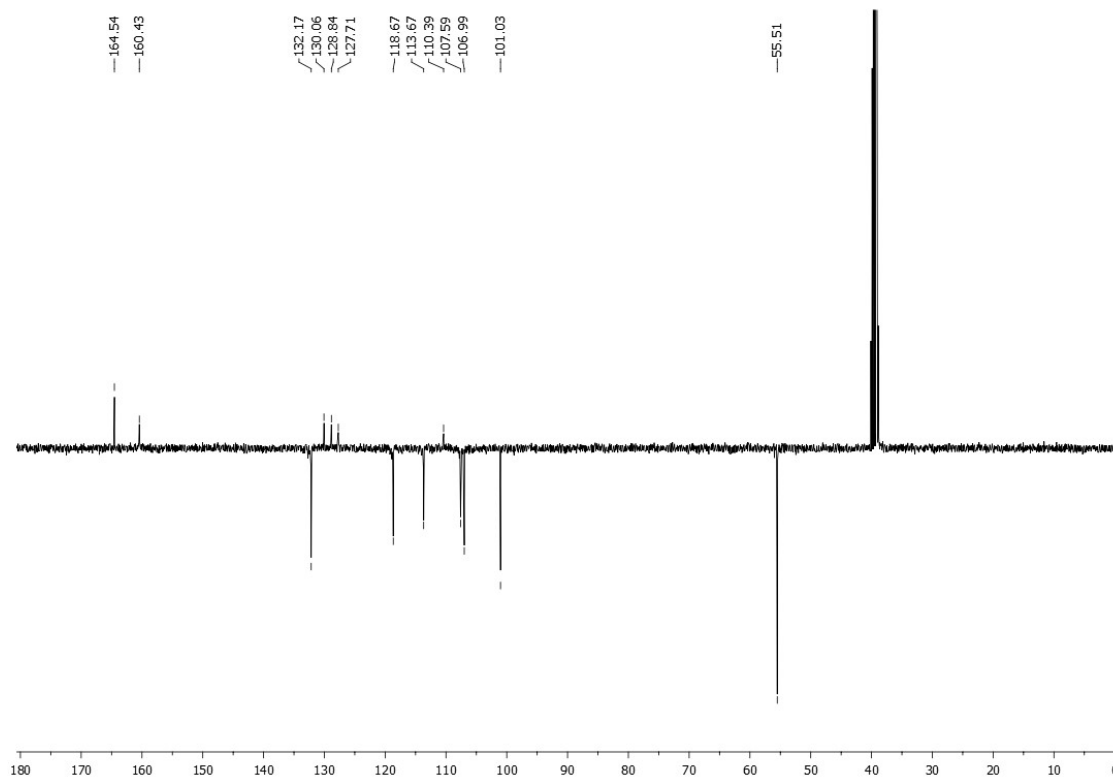

**Figure S50.**  $^{13}\text{C}$  NMR spectrum (DMSO- $d_6$ , 100 MHz) of *N*-[5(6)-aminobenzimidazol-2-yl]-2-hydroxy-4-methoxybenzamide **31**.

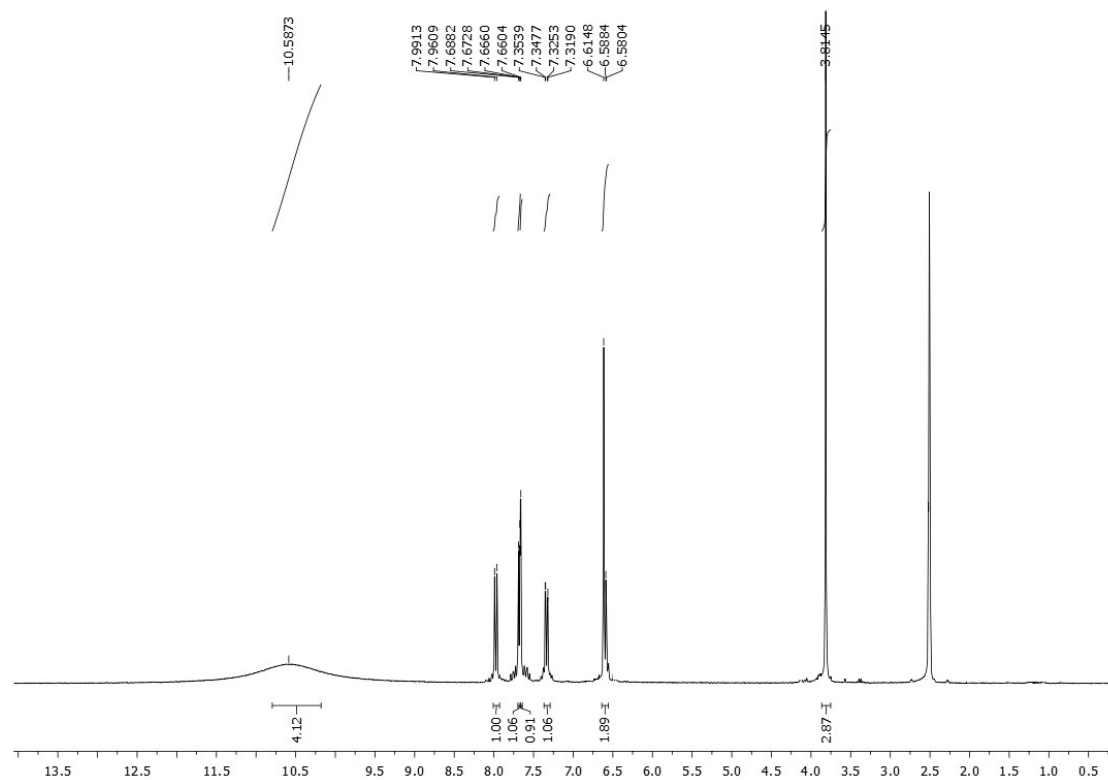

**Figure S51.**  $^1\text{H}$  NMR spectrum (DMSO- $d_6$ , 300 MHz) of *N*-[5(6)-aminobenzimidazol-2-yl]-2-hydroxy-4-methoxybenzamide **32**.

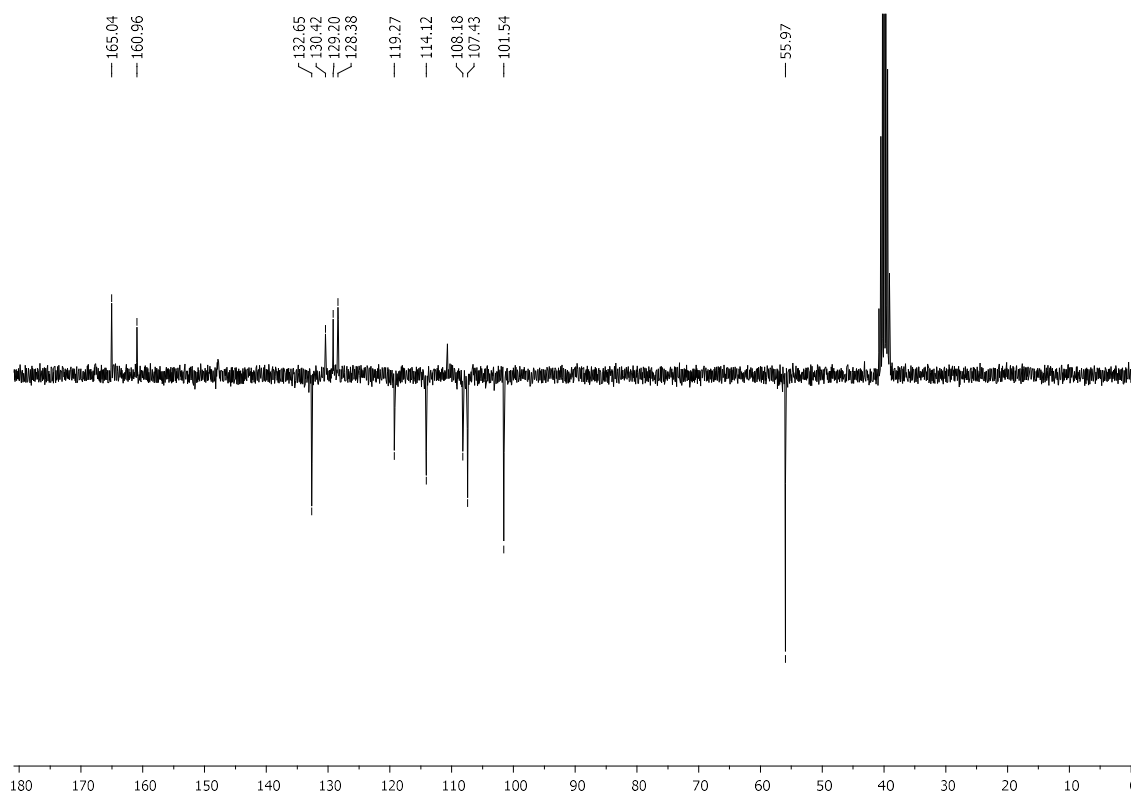

**Figure S52.**  $^{13}\text{C}$  NMR spectrum (DMSO- $d_6$ , 75 MHz) of *N*-[5(6)-aminobenzimidazol-2-yl]-2-hydroxy-4-methoxybenzamide **32**.

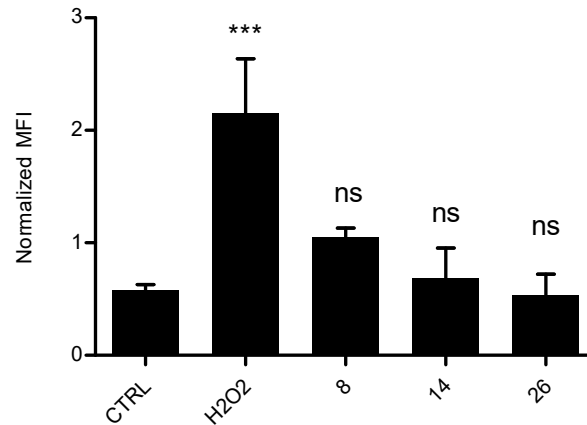

**Figure S53.** Impact of compounds on cellular ROS production was measured with fluorescent dye DCF-DA in HCT116 cell line, after the treatment with 10  $\mu$ M compounds for 1h. H<sub>2</sub>O<sub>2</sub> was used as a positive control. Data presented here are the results of 3 independent measurements, done in duplicates. One-way ANOVA with Tukey's post-hoc test was used for statistical analysis, \*\*\*-  $p < 0.001$ .

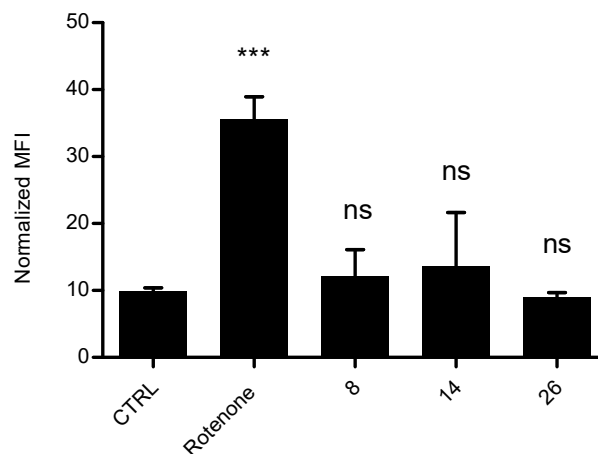

**Figure S54.** Impact of compounds on mitochondrial ROS production was measured with fluorescent dye MitoSOX in HCT116 cell line, after the treatment with 10  $\mu$ M compounds for 1h. Rotenone, which interferes with electron transport chain in mitochondria and induces ROS formation was used as a positive control. Data presented here are the results of 3 independent measurements, done in duplicates. One-way ANOVA with Tukey's post-hoc test was used for statistical analysis, \*\*\*-  $p < 0.001$ .

## Materials and methods

### *Cell culturing*

Human colon carcinoma cell line HCT116 was grown in DMEM medium with the addition of 10% fetal bovine serum (FBS), 2 mM L-glutamine, 100 U/ml penicillin and 100 µg/ml streptomycin, and cultured as monolayers at 37°C in a humidified atmosphere with 5% CO<sub>2</sub>.

### *Cellular ROS measurement assay*

For the cellular ROS measurement assay,  $2.5 \times 10^4$  cells were seeded into 96-well microtiter plates 24h prior to experiment. Next day, cells were trypsinized and incubated in FBS-free DMEM medium with 20 µM DCFH-DA fluorescence dye for 45 minutes. After the incubation, compounds were added without washing and cells were treated with 2 mM H<sub>2</sub>O<sub>2</sub> as a positive control and 10 µM compounds **8**, **14** and **26** for 1 hour. Cells were washed in PBS and DCFH-DA signal was measured by flow cytometry, in FL1 channel.

### *Mitochondrial ROS measurement assay*

For the mitochondrial ROS measurement assay,  $2.5 \times 10^4$  cells were seeded into 96-well microtiter plates 24h prior to experiment. Next day, cells were trypsinized and treated with 3 µM Rotenone as a positive control and 10 µM compounds **8**, **14** and **26** for 1 hour. After the treatment, cells were stained, without washing, with 5 µM MitoSOX fluorescent dye for 30 minutes. Cells were washed in PBS and MitoSOX signal was measured by flow cytometry, in FL2 channel.
